1 **Title**

2 Butyrate producing Clostridiales utilize distinct human milk oligosaccharides correlating to early  
3 colonization and prevalence in the human gut

4 **Authors**

5 Michael Jakob Pichler<sup>1#</sup>, Chihaya Yamada<sup>2#</sup>, Bashar Shuoker<sup>1,7</sup>, Maria Camila Alvarez-Silva<sup>6</sup>,  
6 Aina Gotoh<sup>3</sup>, Maria Louise Leth<sup>1</sup>, Erwin Schoof<sup>1</sup>, Toshihiko Katoh<sup>3</sup>, Mikiyasu Sakanaka<sup>4</sup>,  
7 Takane Katayama<sup>3,4</sup>, Chunsheng Jin<sup>5</sup>, Niclas G. Karlsson<sup>5</sup>, Manimozhiyan Arumugam<sup>6</sup>.  
8 Shinya Fushinobu<sup>2</sup>, Maher Abou Hachem<sup>1,\*</sup>

9 Affiliations

10 <sup>1</sup>Department of Biotechnology and Biomedicine, Technical University of Denmark, Lyngby,  
11 2800, Denmark

12 <sup>2</sup>Department of Biotechnology, The University of Tokyo, 1-1-1 Yayoi, Bunkyo-ku, Tokyo, 113-  
13 8657, Japan

14 <sup>3</sup>Graduate School of Biostudies, Kyoto University, Sakyo-ku, Kyoto, 606-8502, Japan

15 <sup>4</sup>Faculty of Bioresources and Environmental Sciences, Ishikawa Prefectural University,  
16 Nonoichi, Ishikawa, 921-8836, Japan

17 <sup>5</sup>Department of Medical Biochemistry, University of Gothenburg, Gothenburg, 413 90, Sweden

18 <sup>6</sup>The Novo Nordisk Foundation Center for Basic Metabolic Research, Faculty of Health and  
19 Medical Sciences, University of Copenhagen, Copenhagen, 2200, Denmark

20 <sup>7</sup>Division of Biotechnology, Department of Chemistry, Lund University, Lund, 22100, Sweden

21 \*Correspondence: [maha@bio.dtu.dk](mailto:maha@bio.dtu.dk)

22 #These authors contributed equally to this work

23

24

25 Contributions

26 Bacterial growth studies were performed by M.J.P. Proteomic analyses were done by M.J.P and  
27 E.S. Protein characterization was done by M.J.P and M.L.L. Enzymatic characterization of  
28 *RiLe<sup>a/b</sup>136* was performed by A.G., To.K., M.S. and Ta.K. Mucin preparation was performed by  
29 B.S. and M.J.P. Mucin glycomics were performed by B.S., C.J. and N.G.K. Protein X-ray  
30 crystallography was performed by C.Y. and S.F. Metagenome analysis were performed by C.A-  
31 S and M.A. Experiments were designed by M.J.P and M.A.H. The manuscript was drafted by  
32 M.J.P and M.A.H and finalized with contributions of all authors.

33

34

35

## 36 **Abstract**

37 The early life human gut microbiota exerts life-long health effects on the host, but the mechanisms  
38 underpinning its assembly remain elusive. Particularly, the early colonization of Clostridiales from  
39 the *Roseburia-Eubacterium* group, associated with protection from colorectal cancer, immune-  
40 and metabolic disorders is enigmatic. Here we unveil the growth of *Roseburia* and *Eubacterium*  
41 members on human milk oligosaccharides (HMOs) using an unprecedented catabolic apparatus.  
42 The described HMO pathways and additional glycan utilization loci confer co-growth with  
43 *Akkermansia muciniphilia* via cross-feeding and access to mucin O-glycans. Strikingly, both, HMO  
44 and xylooligosaccharide pathways, were active simultaneously attesting an adaptation to a mixed  
45 HMO-solid food diet. Analyses of 4599 *Roseburia* genomes underscored the preponderance of  
46 HMO pathways and highlighted different HMO utilization phylotypes. Our revelations provide a  
47 possible rationale for the early establishment and resilience of butyrate producing Clostridiales  
48 and expand the role of specific HMOs in the assembly of the early life microbiota.

49

## 50 **Introduction**

51 The human gut microbiota (HGM) is a key determinant of health<sup>1-3</sup>. Orthogonal transfer from the  
52 mother contributes markedly to the establishment of this community shortly after birth<sup>4,5</sup>. The HGM  
53 develops dynamically during infancy until a resilient adult-like community is formed after 2-3 years  
54 of life<sup>6-8</sup>. The early life microbiota plays a role in the maturation of the host's endocrine, metabolic  
55 and immune system<sup>9</sup>, and the composition of this consortium appears to be associated with life-  
56 long health effects<sup>10-12</sup>. Therefore, understanding the factors that define the HGM structure during  
57 infancy is critical for minimizing the risk for a range of metabolic, inflammatory and  
58 neurodegenerative disorders, all associated to specific HGM signatures<sup>13,14</sup>.

59 Dietary glycans resistant to digestion by human enzymes are a major driver that shapes the  
60 developing HGM<sup>6,15</sup>. This is emphasized by the dominance of *Bifidobacterium* in breast-fed  
61 infants<sup>7,8</sup>, attributed to the competitiveness of distinct members of this genus in the utilization of  
62 human milk oligosaccharides (HMOs)<sup>16,17</sup>. Indeed, the most prominent changes in the infant  
63 microbiota occur during weaning and the introduction of solid food<sup>6,7</sup>, whereby bifidobacteria are  
64 replaced by Firmicutes as the top abundant phylum of the mature HGM. This compositional shift  
65 is accompanied by a notable longitudinal increases in the concentrations of the short chain fatty  
66 acids (SCFAs) propionate and butyrate (generated from carbohydrate fermentation) during and  
67 after weaning<sup>18</sup>.

68 Butyrate exerts immune-modulatory activities<sup>19</sup> and is associated with a lowered risk of colon  
69 cancer, atherosclerosis, and enteric colitis<sup>20,21</sup>. The bacterial production of butyrate is largely  
70 ascribed to Firmicutes *Clostridium* cluster IV and *Clostridium* cluster XIVa that includes members  
71 of the *Roseburia-Eubacterium* group (Lachnospiraceae family, Clostridiales order), which are  
72 abundant and prevalent members of the adult HGM<sup>22,23</sup>. By contrast, the abundance of *Roseburia*  
73 spp. is decreased in patients suffering from metabolic, inflammatory and cardiovascular  
74 diseases<sup>24-27</sup>. Although butyrate producers are established by the first year of life<sup>27</sup>, the  
75 mechanisms underpinning their early appearance (and prevalence) remain unknown.

76 The evolution of uptake and enzymatic systems that support competitive growth of  
77 *Bifidobacterium* species on HMOs<sup>17</sup> reflects a successful adaptation to the intestines of breast fed  
78 infants. We hypothesized that other taxonomic groups, which possess metabolic capabilities that  
79 target HMOs, may have an early advantage in the colonization of the infant gut during infancy.

80 The early emergence of *Roseburia-Eubacterium* members that comprise the main group of  
81 butyrate producing bacteria in the human adult gut offers a suitable model group to evaluate this  
82 hypothesis. Genomic analyses were suggestive of the presence of putative HMOs utilization gene  
83 clusters in *Roseburia* and *Eubacterium* strains. Growth on distinct HMOs (pure or in a complex  
84 mixture from mothers milk) and differential proteomics from HMO growth experiments provided  
85 compelling evidence for the molecular basis of HMO utilization by this taxonomic group. We  
86 corroborated these finding by molecular characterization of the enzymes and transport proteins  
87 that confer growth on HMOs. These analyses disclosed an unprecedented enzymatic activity and  
88 a previously unknown structural fold highlighting the uniqueness in the enzymology of HMOs  
89 utilization by this taxonomic group. We also showed that the unveiled catabolic pathways support  
90 cross-feeding on mucin O-glycans in co-culture with the model mucin degrader *Akkermansia*  
91 *muciniphila*. Analyses of the metagenome of *Roseburia*, showed a striking conservation and  
92 preponderance of the HMO utilization pathways across the genus, underscoring their importance  
93 for adaptation to the human gut. This study provides unprecedented mechanistic details into  
94 pathways that may contribute to the early colonization and the resilience of key butyrate producing  
95 Clostridiales by mediating the catabolism of distinct HMOs and host O-glycans.

96

## 97 Results

### 98 ***Roseburia hominis* and *Roseburia inulinivorans* possess conserved gene loci that** 99 **support growth on distinct human milk oligosaccharides (HMOs)**

100 We hypothesized that HMO utilization may confer an early advantage in the assembly of early life  
101 HGM. Genomic analyses of butyrate producers from Lachnospiraceae identified distant homologs  
102 of the recently discovered glycoside hydrolase family 136 (GH136) in the Carbohydrate Active  
103 enZyme database ([www.cazy.org](http://www.cazy.org)) (Supplementary Fig. 1). This family was assigned based on  
104 the lacto-*N*-biosidase LnbX from *Bifidobacterium longum* subsp. *longum* JCM 1217<sup>28</sup>, which  
105 cleaves the key HMO lacto-*N*-tetraose (LNT) to lacto-*N*-biose (LNB) and lactose (EC 3.2.1.140;  
106 Supplementary Table 1).

107 We selected two *Roseburia* strains and one from *Eubacterium*, all having GH136-like genes, to  
108 examine their HMO utilization capabilities.

109 Significant growth was observed for *Roseburia hominis* DSM 16839 ( $p < 4.0 \times 10^{-4}$ ) and *Roseburia*  
110 *inulinivorans* DSM 16841 ( $p < 1.3 \times 10^{-4}$ ) after 24 h on media supplemented with HMOs from  
111 mother milk, but the growth of *R. inulinivorans* was more efficient ( $\mu_{\max} = 0.30 \pm 0.01 \text{ h}^{-1}$ ). Next, we  
112 carried out growth on building blocks present in HMOs and related oligomers from O-  
113 glycoconjugates (Fig. 1a-d). *R. hominis* grew efficiently on LNT ( $\mu_{\max} = 0.22 \pm 0.02 \text{ h}^{-1}$ ), its LNB  
114 unit ( $\mu_{\max} = 0.16 \pm 0.01 \text{ h}^{-1}$ ) and the mucin derived galacto-*N*-biose (GNB) ( $\mu_{\max} = 0.21 \pm 0.02 \text{ h}^{-1}$ ).  
115 By contrast, *R. inulinivorans* grew better on LNB and GNB relative to LNT. Growth on LNT was  
116 also shared by the taxonomically related *Eubacterium ramulus* DSM 15684 from Eubacteriaceae.  
117 *R. inulinivorans* was distinguished by growth on sialic acid (Neu5Ac), abundant in HMOs and  
118 glycoconjugates (Fig. 1d).

119 To unravel the basis of growth on HMOs, we analyzed the differential proteomes of *R. hominis*  
120 and *R. inulinivorans* on LNT and the HMO mixture, respectively, relative to glucose. For *R.*  
121 *hominis* and *R. inulinivorans*, 15 and 62 proteins, respectively, were significantly upregulated ( $\log_2$   
122 fold change > 2). These differential proteomes were dominated by carbohydrate metabolism  
123 proteins, especially products of two loci, both encoding an ATP-binding cassette (ABC)  
124 transporter, GH112 and GH136 enzymes with putative HMO activities, as well as sensory and  
125 transcriptional regulators (Fig. 1f,g). The HMO locus of *R. inulinivorans* is extended with two  
126 fucosidases of GH29 and GH95. The specificity-determining solute binding proteins (SBPs) of the  
127 ABC transporters of *R. hominis* (*RhLNBBP*) and *R. inulinivorans* (*RiLe<sup>ab</sup>BP*) were the first and  
128 fifth top-upregulated proteins in the HMO proteomes, respectively. In addition, the GH112  
129 LNB/GNB phosphorylases were within the top 3 and 12 upregulated proteins in *R. hominis* and  
130 *R. inulinivorans*, respectively. In *R. inulinivorans* two additional loci encoding sialic acid and  
131 fucose catabolism proteins, were also upregulated (Supplementary Fig. 3).

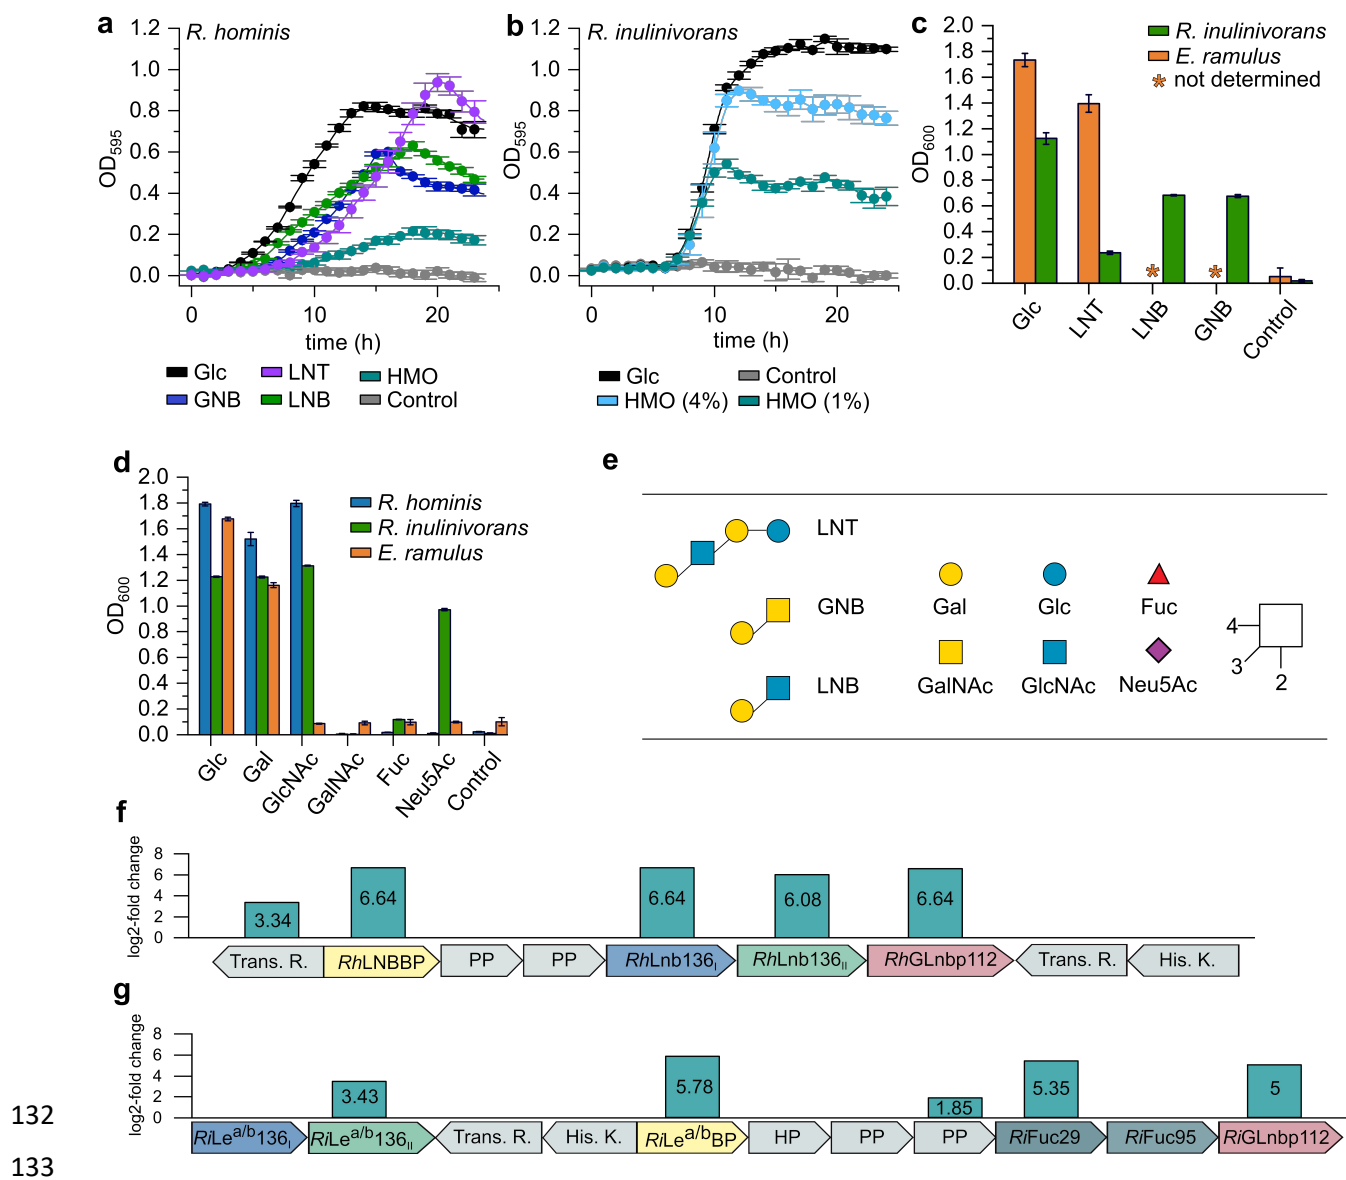

134 **Fig. 1: Growth of *R. hominis*, *R. inulinivorans* and *E. ramulus* on HMOs and upregulation of core HMOs**  
 135 **utilization loci:** Growth curves of *R. hominis* (a) and *R. inulinivorans* (b) on glucose, LNT, GNB, LNB, and/or purified  
 136 HMOs from mothers milk compared to a no-carbon source controls over 24 h. c, Growth levels of *R. inulinivorans*  
 137 on LNT, LNB, GNB and of *E. ramulus* on LNT within 24 h including glucose and a non-carbon source controls. d, Growth  
 138 of *R. hominis*, *R. inulinivorans* and *E. ramulus* on monosaccharides from HMOs and mucin after 24 h. The growth  
 139 analyses (a-d) on media supplemented with 0.5 % (w/v) carbohydrates (except for *R. inulinivorans* on 1% (w/v) and  
 140 4% (w/v) purified HMOs from mothers milk) are means of triplicates with standard deviations. e) HMO and mucin-  
 141 derived oligo- and monosaccharides used for the growth analyses in (a-d). The core HMO utilization loci in *R. hominis*  
 142 (f) and *R. inulinivorans* (g) identified from proteomic analyses of cells growing on LNT and HMOs from mothers milk,  
 143 respectively, relative to glucose. The proteomic analyses (f-g) were performed in biological triplicates and the log<sub>2</sub>-fold  
 144 change from the label free quantification of upregulated gene products is shown. Glycan structures presentation  
 145 according to Symbol Nomenclature for Glycans (SNFG) (<https://www.ncbi.nlm.nih.gov/glycans/snfg.html>).

146

147

148 **Transport proteins of *R. hominis* and *R. inulinivorans* capture HMO blocks and host-**  
 149 **derived oligosaccharides**

150 The proteomic analyses highlighted the putative protein apparatus required for growth on HMOs.  
 151 The solute binding proteins (SBPs) of two ABC transporters in *R. hominis* and *R. inulinivorans*  
 152 were within the top 8% upregulated proteins, hinting their involvement in uptake of HMOs. Both  
 153 SBPs recognized distinct HMOs and ligands from host-glycans (Table 1, Supplementary Tables  
 154 2 and 3, Supplementary Fig. 4). The *R. hominis* SBP (LNB-binding protein, *RhLNBBP*) displays  
 155 a preference for LNB followed by about 3.5 fold lower affinities towards GNB and LNT. By  
 156 contrast, the SBP of *R. inulinivorans* (*Le<sup>ab</sup>* binding protein, *RiLe<sup>ab</sup>*BP) prefers fucosyl-decorated  
 157 Lewis b (*Le<sup>b</sup>*) tetraose and Lewis a (*Le<sup>a</sup>*) triose followed by LNB and GNB, whereas no binding  
 158 was detected to LNT (Table 1). The loss of the fucosyl unit at the terminal reducing GlcNAc  
 159 reduced the affinity of *RiLe<sup>ab</sup>*BP about 5-fold for blood group H antigen triose type I (H triose type  
 160 I) relative to *Le<sup>b</sup>* tetraose. *RiLe<sup>ab</sup>*BP had no affinity for lacto-*N*-neotetrose (LNT) and blood  
 161 group A antigen triose (A triose). Lactose and 2'-fucosyllactose (2'-FL) were not recognized by  
 162 either SBP. These results established the capture of specific HMOs and related ligands by these  
 163 SBPs and the differentiation of their specificities, e.g. preference of *RiLe<sup>ab</sup>*BP to fucosylated  
 164 ligands at the terminal reducing GlcNAc.

**Table 1: Binding analysis of HMOs and related host-derived oligosaccharides to transport proteins from *R. hominis* and *R. inulinivorans*.**

| Ligand                         | <i>RhLNBBP</i>                        | <i>RiLe<sup>ab</sup></i> BP           | Structure                                                                             |
|--------------------------------|---------------------------------------|---------------------------------------|---------------------------------------------------------------------------------------|
|                                | <i>K<sub>D</sub><sup>a</sup></i> (μM) | <i>K<sub>D</sub><sup>b</sup></i> (μM) |                                                                                       |
| LNB                            | 2.9 ± 0.3                             | 6.7 ± 0.7                             |  |
| GNB                            | 11.1 ± 0.1                            | 11 ± 0.9                              |  |
| <i>Le<sup>b</sup></i> tetraose | n.d. <sup>c</sup>                     | 1.8 ± 0.1                             |  |
| <i>Le<sup>a</sup></i> triose   | n.d.                                  | 3.2 ± 0.5                             |  |
| H triose type I                | n.d.                                  | 11.3 ± 2.5                            |  |
| LNT                            | 10.3 ± 0.6                            | n.b. <sup>d</sup>                     |  |

<sup>a</sup>*K<sub>D</sub>* was determined by isothermal titration calorimetry (ITC). <sup>b</sup>*K<sub>D</sub>* was determined by surface plasmon resonance (SPR). Both analyses were in duplicates and the *K<sub>D</sub>* values are means with standard deviations. The errors from the fit of a one-binding site model to the binding isotherms are reported for the ITC experiments. <sup>c</sup>n.d.: not determined. <sup>d</sup>n.b.: low affinity precluding reliable determination of the binding constant.

165

166

167

168 **Functionally diverse GH136 enzymes confer the initial hydrolysis of HMO blocks and**  
169 **related oligosaccharides within *Roseburia* and *Eubacterium***

170 The difference in transport preferences between *R. hominis* and *R. inulinivorans* was indicative  
171 of different routes for the utilization of HMO-blocks and related oligomers.

172 The affinity of *RhLNBBP* from *R. hominis* for LNT, suggested the uptake and subsequent  
173 intracellular degradation. Besides the ABC importer, the HMO utilization locus in *R. hominis*  
174 encodes distant homologs of the two proteins reported to be necessary for the heterologous  
175 expression of the GH136 lacto-*N*-biosidase from *B. longum*<sup>29</sup>. The homologs *RhLnb136<sub>I</sub>* (*LnbY* in  
176 *B. longum*) and *RhLnb136<sub>II</sub>* (Fig. 1f and Supplementary Fig. 1) that harbors the catalytic residues  
177 (*LnbX* in *B. longum*) were highly co-upregulated in the LNT proteome of *R. hominis*. Both proteins  
178 lacked predicted signal peptides and transmembrane domains (Supplementary Fig. 8a), in  
179 contrast to the *B. longum* counterparts, suggesting the intracellular degradation of LNT in *R.*  
180 *hominis*. Only co-expression and co-purification of *RhLnb136<sub>I</sub>* and *RhLnb136<sub>II</sub>* resulted in an  
181 active lacto-*N*-biosidase (henceforth *RhLnb136*) (Fig. 2b, Supplementary Table 4). These findings  
182 and the observed co-upregulation, suggested that a hetero-oligomer of the *RhLnb136<sub>I</sub>* and  
183 *RhLnb136<sub>II</sub>* subunits assembles the catalytically active *RhLnb136*. Next, we demonstrated  
184 phosphorolysis of LNB and GNB to  $\alpha$ -D-galactose-1-phosphate and the corresponding *N*-  
185 acetylhexosamines GlcNAc and GalNAc, respectively (Supplementary Fig. 6f), by the GH112  
186 GNB/LNB phosphorylase (*RhGLnbp112*) in the same locus (Fig. 1f and Supplementary Fig. 1).  
187 This enzyme has comparable specific activities for LNB and GNB (Supplementary Table 5)  
188 consistent with the growth data on these disaccharides. The functional lacto-*N*-biosidase and  
189 GNB/LNB phosphorylase further support the HMO catabolism role of the locus.

190 The SBP of *R. inulinivorans* had no measurable affinity for LNT in accord with the poor growth  
191 (Fig. 1c). Intriguing differences were also observed in the GH136 homolog from the HMO-  
192 upregulated locus in *R. inulinivorans* compared to *RhLnb136*: 1) the *RiGH136<sub>I</sub>* subunit has an N-  
193 terminal transmembrane domain, 2) a signal peptide was predicted at the N-terminus of  
194 *RiGH136<sub>II</sub>*, 3) the presence of two C-terminal putative carbohydrate binding modules in *RiGH136<sub>II</sub>*  
195 (Supplementary Fig. 8a). Co-expression of *RiGH136<sub>I</sub>* and *RiGH136<sub>II</sub>*, lacking the transmembrane  
196 domain and signal peptide respectively, resulted in an active enzyme with an unprecedented  
197 specificity. This enzyme (*RiLe<sup>a/b</sup>136*) released Lewis a triose or Lewis b tetraose from fucosylated  
198 HMOs including lacto-*N*-fucopentaose II (LNFP II), lacto-*N*-difucohexaose I (LNDFH I) and lacto-  
199 *N*-difucohexaose II (LNDFH II) (Fig. 2a and Supplementary Fig. 6a). To our knowledge, enzymatic  
200 activity on the glycosidic bond at the reducing end of a fucosylated-GlcNAc unit in the above  
201 HMOs has not been reported to date. The products of *RiLe<sup>a/b</sup>136* are the preferred ligands for  
202 *RiLe<sup>a/b</sup>BP*, suggesting the uptake of these products by the ABC-transporter. Next, we showed that  
203 the concerted action of *RiFuc29* and *RiFuc95* that act on  $\alpha$ -(1 $\rightarrow$ 4) and  $\alpha$ -(1 $\rightarrow$ 2)-linked L-fucosyl,  
204 respectively mediates the complete defucosylation of Le<sup>b</sup> tetraose, Le<sup>a</sup> triose and H triose type I  
205 (Supplementary Fig. 6b-d). Initial defucosylation by *RiFuc29* is required for releasing the 1 $\rightarrow$ 2  
206 linked L-fucosyl in Le<sup>b</sup> tetraose by *RiFuc95*. Finally, we showed that the GH112 from *R.*  
207 *inulinivorans* (*RiGLnbp112*) phosphorolyzes LNB and GNB equally efficiently (Supplementary  
208 Fig. 6e, Supplementary Table 5).

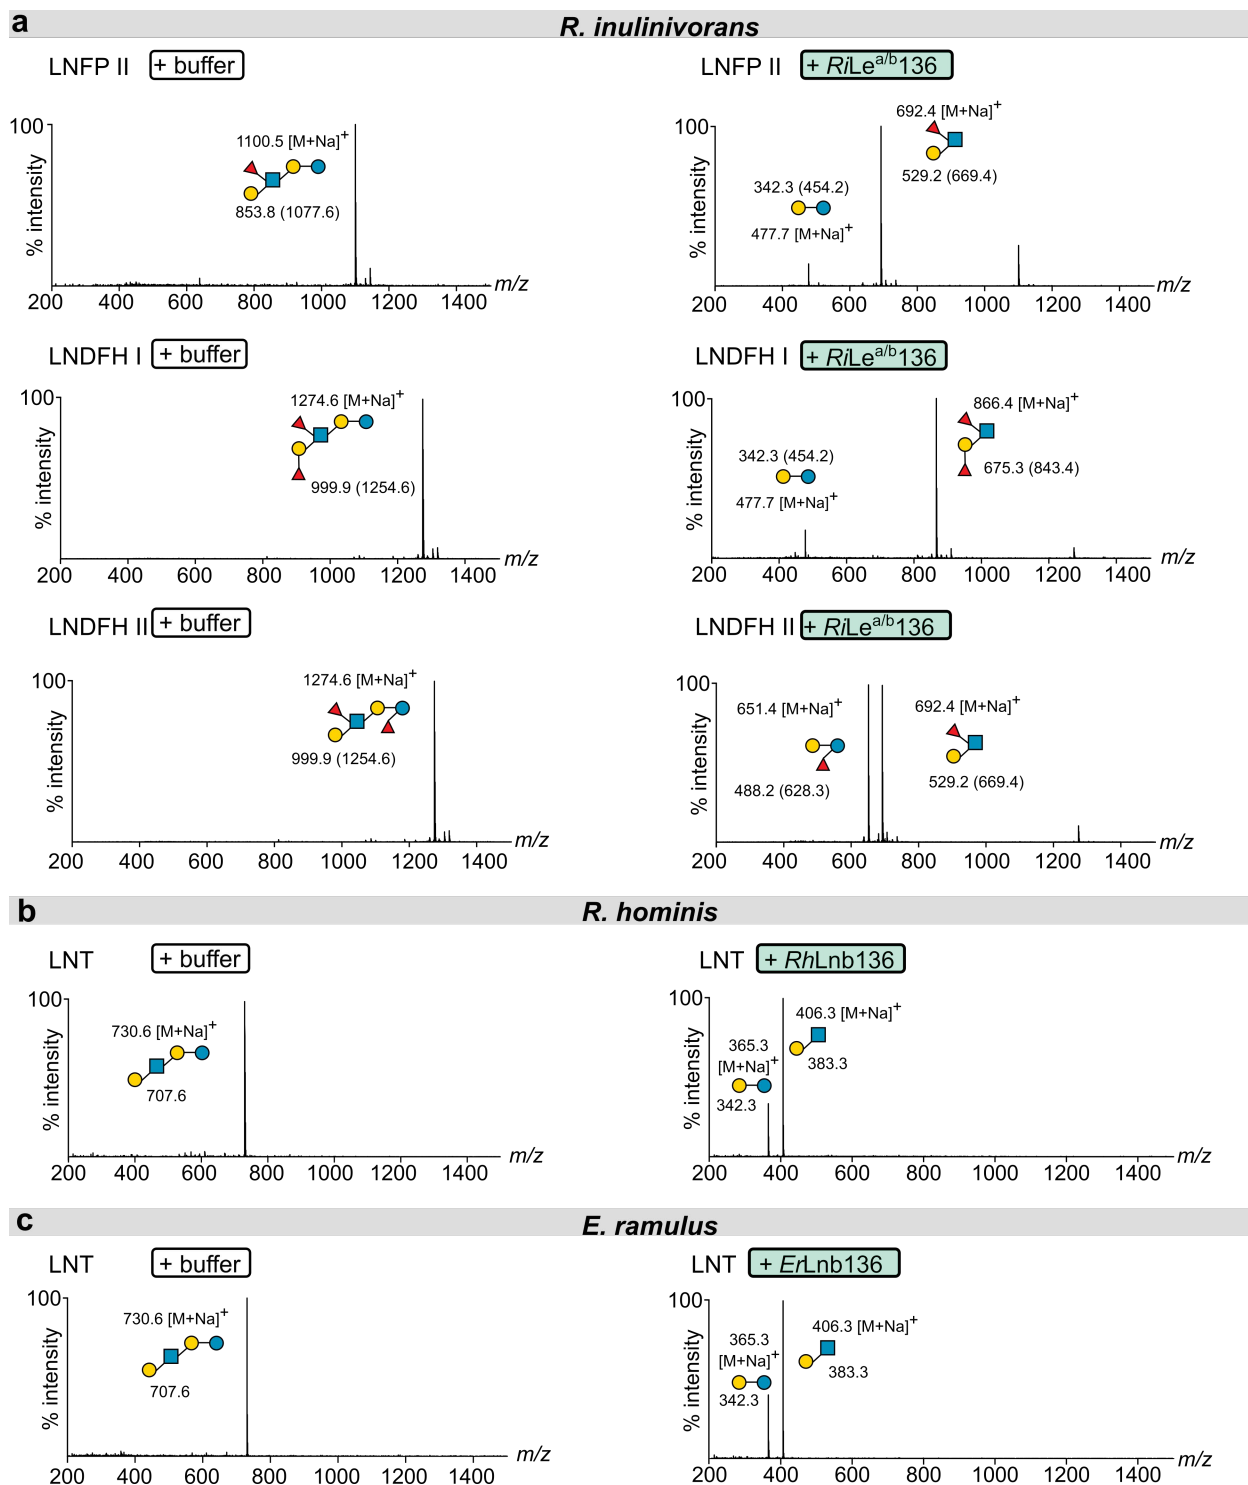

209

210 **Fig. 2: Different specificities of GH136 enzymes in *Roseburia* and *Eubacterium* mediate the degradation of**  
 211 **distinct HMOs. (a), Activity of *RiLe*<sup>a/b</sup>136 on fucosylated HMOs. (b), Activity of *RhLnb*136 on LNT. (c), Activity of**  
 212 ***ErLnb*136 on LNT. (a-c), The hydrolysates were analyzed by MALDI-ToF MS without (b,c) or with (a) previous**  
 213 **permethylation. (a), Masses of methylated sugars are in parentheses and the ion peaks correspond to the sodium**  
 214 **adducts of the methylated sugars. (a-c) relative intensity (% intensity) is shown.**

215



216 **A domain with a previously undescribed fold is required for the activity of GH136 enzymes**  
217 **on HMOs**

218 The identification of a *RhLnb136<sub>II</sub>* homolog with high (>60 %) amino acid sequence identity in *E.*  
219 *ramulus* (*ErLnb136<sub>I</sub>*; Supplementary Fig. 1 and 8a,b) is consistent with the proficient growth of this  
220 strain on LNT. Surprisingly, no adjacent GH136<sub>I</sub> homolog was identified. Instead, the functionally  
221 unassigned N-terminal region of *ErLnb136* displayed ≈40% amino acid sequence identity to  
222 *RhLnb136<sub>I</sub>* (Supplementary Fig. 8b), which was suggestive of the fusion of *ErLnb136<sub>I</sub>* and  
223 *ErLnb136<sub>II</sub>* into a single protein. Indeed, *ErLnb136* displayed ≈3.9 fold higher catalytic efficiency  
224 on LNT than *RhLnb136* (Supplementary Table 4). A single thermal transition was observed for  
225 the unfolding of *ErLnb136*, suggesting a cooperative unfolding and intimate interaction of the two  
226 domains (Supplementary Fig. 8c). We crystallized this enzyme to discern the interactions between  
227 the two subunits/domains compulsory for activity within GH136. The crystal structures of  
228 selenomethionine (SeMet)-labelled and native *ErLnb136* were determined at 1.4 Å and 2.0 Å  
229 resolution, respectively (Supplementary Table 6). The C-terminal catalytic GH136 domain  
230 (*ErLnb136<sub>II</sub>*, from AA 242-663) assumes a β helix fold (Fig. 3) similar to the bifidobacterial homolog  
231 *B/LnbX* (Supplementary Table 7). The LNB molecule bound in the active site is recognized by ten  
232 potential hydrogen bonds and aromatic stacking of the Gal unit onto W548 (Fig. 3f and  
233 Supplementary Fig. 9a). Interestingly, the GlcNAc sugar ring of LNB in *ErLnb136* adopts an <sup>4</sup>*E*  
234 conformation ( $\varphi = 232^\circ$  and  $\psi = 68^\circ$ ), enabling the O1-OH to adopt a pseudo-axial position to  
235 form a direct hydrogen bond with the catalytic acid/base residue (D568) (Supplementary Fig. 9a).  
236 Moreover, the D575 O<sup>δ2</sup> of the nucleophile is positioned appropriately for a nucleophilic attack on  
237 the anomeric carbon of the GlcNAc at a distance of 3.2 Å (Fig. 3f).

238 The N-terminal domain (*ErLnb136<sub>I</sub>*, from AA 7-224) consists of 8 α-helices (α1-α8) (Fig. 3a-c) and  
239 assumes a previously unknown fold, stabilized by the central helix α1. The structurally most  
240 related protein to *ErLnb136<sub>I</sub>*, a peptidyl-prolyl cis-trans isomerase with a chaperone activity from  
241 *Helicobacter pylori* (5EZ1), shares weak structural similarity restricted to helices α6 and α7  
242 (Supplementary Fig. 9b, Supplementary Table 7). The *ErLnb136<sub>I</sub>* domain embraces the sides and  
243 back of the β helix domain (Fig. 3a-c). These extensive inter-domain interactions (solvent  
244 inaccessible interface ≈1618 Å<sup>2</sup>), stabilize the protein structure with ΔG= -17 kcal mol<sup>-1</sup>.  
245 Remarkably, the α6-α7 loop of *ErLnb136<sub>I</sub>* forms a part of the active site with the solvent accessible  
246 sidechain of Y145 positioned near the active site (5.7 Å to the GlcNAc O1 atom of LNB) (Fig. 3d,  
247 e). The Y145A mutant showed a 4.9-fold higher *K<sub>M</sub>* (Supplementary Table 4, Supplementary Fig.  
248 8d), suggesting that this residue contributes to substrate interactions, possibly at the +1 subsite.

249

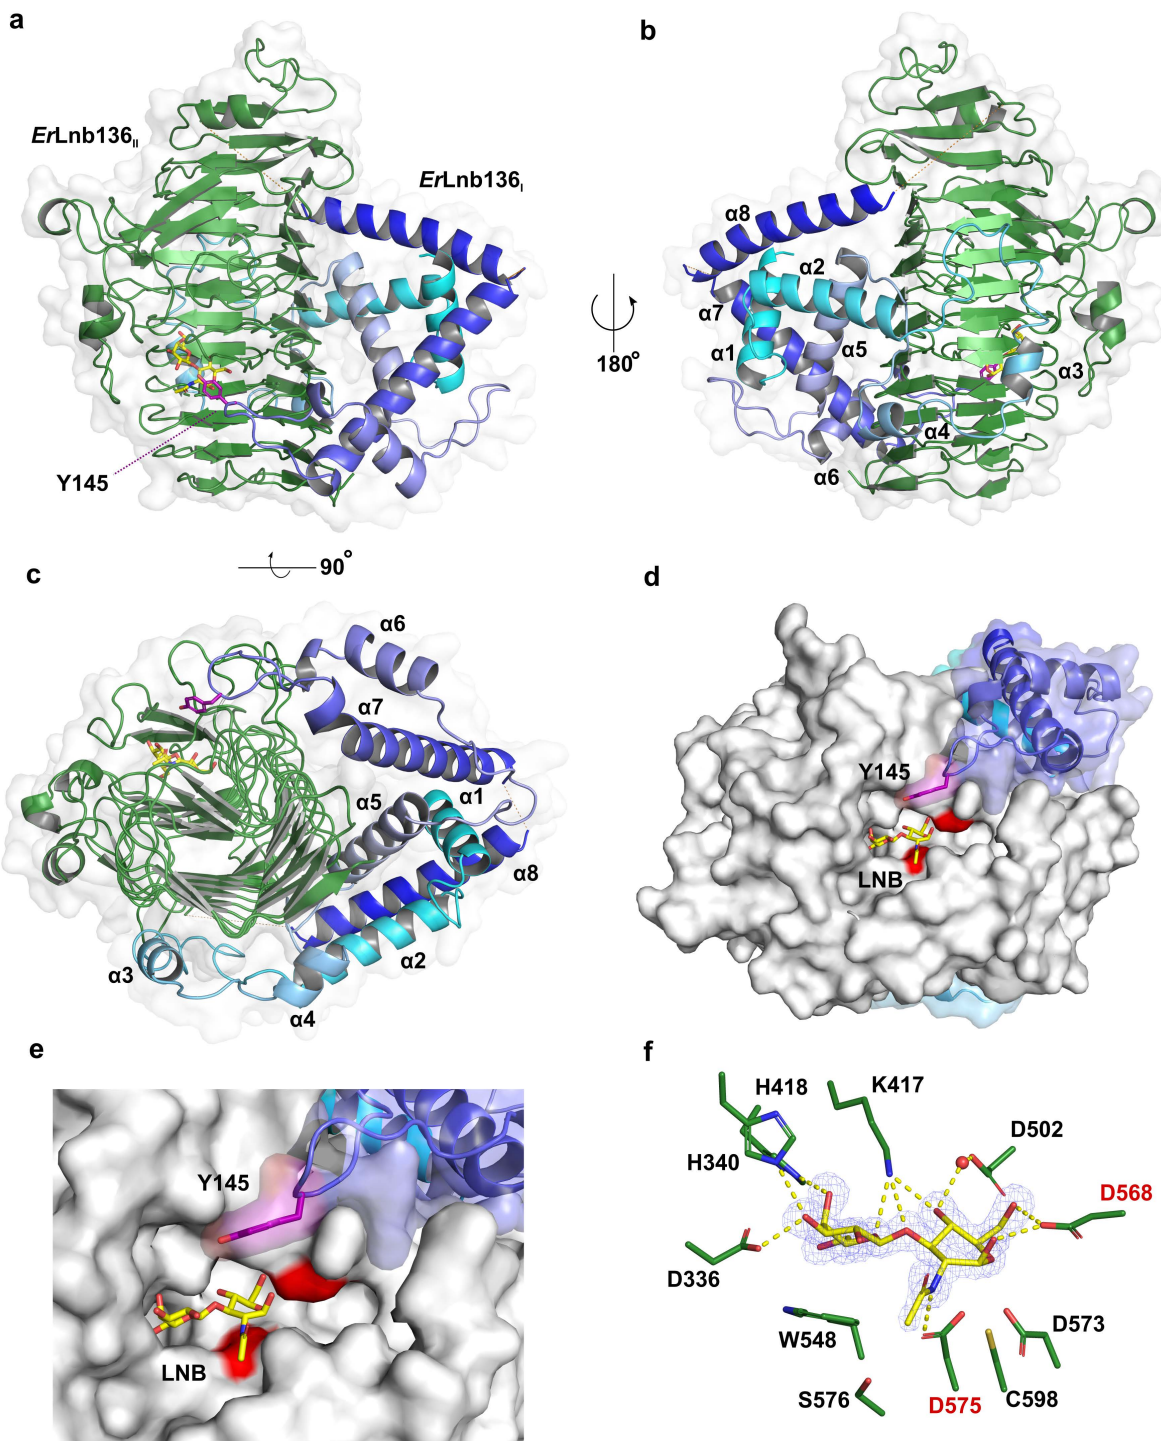

250

251 **Fig. 3: Crystal structure of the GH136 lacto-*N*-biosidase from *E. ramulus* (*ErLnb136*).** (a-c) Overall structure and  
 252 a semitransparent surface of *ErLnb136* consisting of an N-terminal domain designated as *ErLnb136*<sub>i</sub> (cyan-blue) and  
 253 a C-terminal  $\beta$ -helix domain (green) -*ErLnb136*<sub>ii</sub>. The enzyme is shown in (a) a view orthogonal to the C-terminal  $\beta$   
 254 helix domain, (b) the view of (a) rotated 180° and (c) a view along the axis of C-terminal  $\beta$  helix domain, to highlight the  
 255 interaction of the *ErLnb136*<sub>i</sub> and *ErLnb136*<sub>ii</sub> domains. (d), A molecular surface top view of the active site and a close  
 256 up view (e) to illustrate the contribution of the N-terminal *ErLnb136*<sub>i</sub> domain to the active site architecture, especially  
 257 the tyrosine (Y145, magenta) that contributes to substrate affinity. (f) The weighted  $mF_o-DF_c$  omit electron density map  
 258 (contoured at 4.0  $\sigma$ ) of the LNB unit (yellow sticks) bound at the active site of *ErLnb136* is shown. The water (red  
 259 sphere) mediated and direct hydrogen bonds that recognize the LNB are shown as yellow dashed lines. (d-f) The  
 260 catalytic nucleophile (D575) and catalytic acid/base residue (D568) are highlighted with red labels. (a-c) Disordered  
 261 regions (residues 180-199 and 225-241) are shown as orange dotted lines

## 262 **Cross-feeding and increased butyrate production from *Roseburia* in mucin cocultures** 263 **with *Akkermansia muciniphila***

264 HMOs and O-glycans from glycolipids and glyco-proteins including mucin share structural motifs.  
265 The high affinity of the SBPs from *Roseburia* for GNB suggested possible foraging of mucin  
266 (and/or oligomers from glycoconjugates) and thereby a metabolic interplay of *Roseburia* with  
267 mucolytic HGM members. To evaluate possible mechanisms of cross-feeding we compared  
268 *Roseburia* growth on mucin with and without the model mucin degrader *A. muciniphila*<sup>30</sup>.

269 A co-culture of *R. hominis* and *R. inulinivorans* displayed no growth within 24 h on a mucin mixture  
270 and only poor growth after 48 h (Supplementary Fig. 7a,b), in contrast to *A. muciniphila* that grew  
271 well within 24 h. The co-culture of the two *Roseburia* species and *A. muciniphila* grew to a  
272 significantly higher  $OD_{600}$  than *A. muciniphila* alone ( $p < 3.7 \times 10^{-6}$  at 24 h,  $p < 1.3 \times 10^{-3}$  at 48  
273 h)(Supplementary Fig. 7a). This growth is supported by a 4.5 fold higher butyrate level in the co-  
274 culture supernatants than *Roseburia* alone (24 h). After 48 h, a slight increase in butyrate  
275 concentration was also detected in cultures containing only *Roseburia* consistent with the growth  
276 data (Supplementary Fig. 7c).

277 To unveil the basis for the *Roseburia* growth, the proteomes of *R. hominis* and *R. inulinivorans*  
278 were compared between co-cultures of *Roseburia* and *A. muciniphila* grown on mucin and  
279 glucose, respectively. For *R. hominis* and *R. inulinivorans*, 31 and 93 proteins, including several  
280 CAZymes, were significantly upregulated ( $\log_2$  fold change  $> 2$ ) (Supplementary Fig. 7e-h) relative  
281 to the glucose co-cultures. The transport protein *RhLNBBP* and *RhGLnbp112* from the *R. hominis*  
282 HMO locus (Fig. 1f) were the top 6<sup>th</sup> and 10<sup>th</sup> most upregulated proteins in the mucin proteome  
283 of *R. hominis*, respectively, highlighting the role of this locus in cross-feeding on host glycans  
284 (Supplementary Fig. 7g). In *R. inulinivorans*, the corresponding proteins *RiLe<sup>ab</sup>BP* and *RiLNBBP*  
285 were also significantly upregulated with  $\log_2$  fold changes of 2.77 and 4.74, respectively. However,  
286 the top upregulated protein in the *R. inulinivorans* proteome was a SBP of an ABC transporter co-  
287 localised with genes encoding a blood group A- and B- cleaving endo- $\beta$ -(1 $\rightarrow$ 4)-galactosidase  
288 (*RiGH98*), a putative  $\alpha$ -galactosidase of GH36 and an  $\alpha$ -L-fucosidase (GH29), which was the top  
289 fourth upregulated protein in the mucin proteome of *R. inulinivorans* (Supplementary Fig. 7h). The  
290 upregulation of this locus suggested that *R. inulinivorans* possesses a functional machinery for  
291 directly accessing certain mucin oligomers. We expressed the predicted extracellular *RiGH98* and  
292 demonstrated robust release of blood group A and B oligomers from mucin and related O-glycans  
293 (Supplementary Fig. 7i-j, Supplementary Table 9). The co-upregulation of a locus encoding a  
294 fucose utilization pathway (Supplementary Fig. 3a) is in accordance with the release of  
295 fucosylated oligomers by *RiGH98*. Another route of foraging, was suggested by the high  
296 upregulation of the sialic acid catabolism pathway (Supplementary Fig. 3b), which likely confers  
297 the potent growth of *R. inulinivorans* on this substrate (Fig. 1d). These findings establish that the  
298 HMOs utilization machinery and additional functional operons support co-growth with *A.*  
299 *muciniphila* on mucin.

## 300 **The HMO utilization loci are preponderant in the *Roseburia* genome**

301 The HMO loci, defined by the co-occurrence of GH136 and GH112 genes, are conserved in 5  
302 *Roseburia* reference genomes (Supplementary Fig. 1). To broadly examine the structure and  
303 conservation of these loci, the presence of homologs of the aforementioned genes was mapped  
304 across 4599 previously reconstructed *Roseburia* genomes<sup>31</sup>. As a reference signature for a  
305 central catabolic pathway, the presence of GH10 xylanase genes, compulsory for xylan utilization  
306 as shown in *R. intestinalis*<sup>32</sup>, was also analyzed. Strikingly, the GH112 and GH136 HMO utilization

307 genes are about 2-3 fold more abundant than the GH10 counterparts (Fig. 4a), indicative of the  
308 broader distribution of the HMO loci compared to the xylanase locus, which is mainly conserved  
309 in *R. intestinalis*. The GH136<sub>I</sub> and GH136<sub>II</sub> genes have a similar abundance, which is about 30 %  
310 lower than that of GH112. This overall trend is reiterated from analyses of individual species-level  
311 genome bins (SGBs), but differences in the co-occurrence patterns of GH136 and GH112 genes  
312 in different *Roseburia* phylotypes were observed (Fig. 4b). Interestingly, GH136 genes were either  
313 absent or far less abundant than GH112 counterparts in several SGB, whereas the converse was  
314 only true for a single SGB (4959) that represents 0.65% of the total number of the analysed  
315 *Roseburia* genomes. The higher abundance of GH112 genes, associated with the phosphorolysis  
316 of HMO or mucin derived disaccharides, prompted us to analyze the organization of 1397 loci,  
317 defined by the presence of GH112 sequences in the same metagenomic dataset with a more  
318 stringent threshold (70% identity to GH112 sequences present in 5 *Roseburia* reference genomes  
319 (Supplementary Fig. 1)). The composition of the gene landscapes appeared to be SGBs specific  
320 (Fig. 4c). An ABC transporter, GH136<sub>I</sub>/GH136<sub>II</sub>, and transcriptional regulators were, however, the  
321 most frequently co-occurring genes with GH112 gene, which offers a robust signature of the core  
322 HMO utilization loci (Fig. 4d) and validates the broad distribution of the pathways described in the  
323 present study. Additional CAZymes and carbohydrate metabolic genes were also frequently co-  
324 occurring in the vicinity of GH112 genes, suggesting that additional glycan utilization capabilities  
325 are clustered around the HMO loci. The *Ri*GH136-like sequences (Fig. 4d) are likely to be  
326 underestimated due to the divergence of this clade of GH136 that resembles a previously  
327 unknown specificity.

328

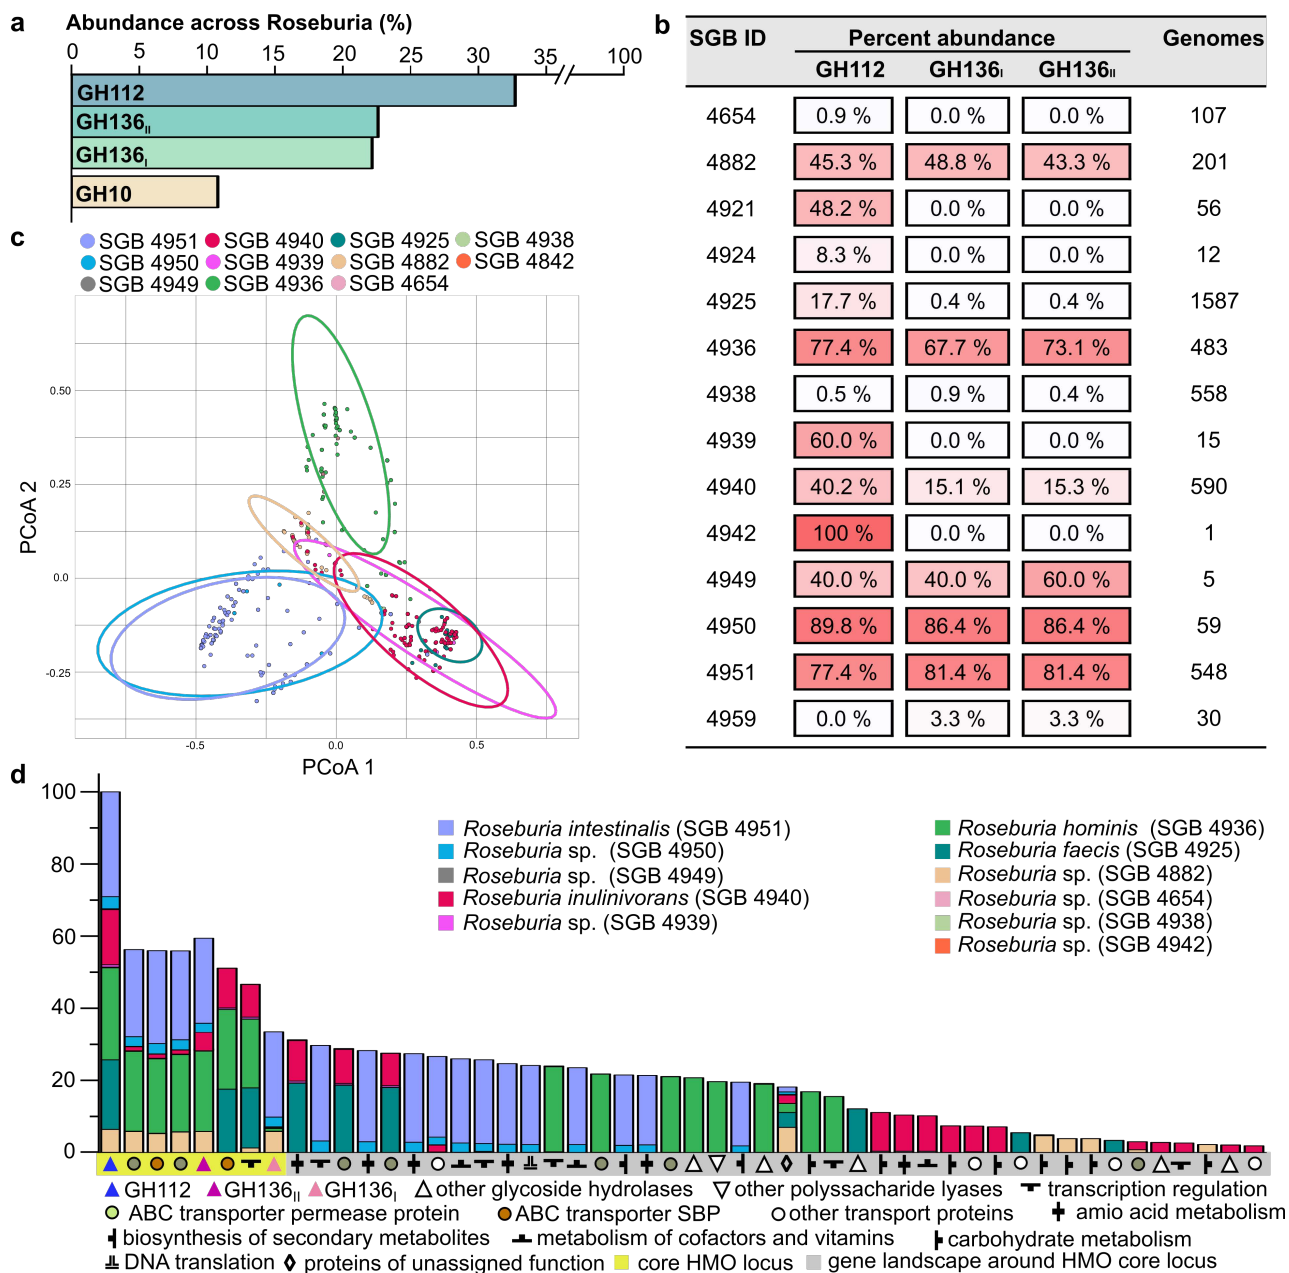

329

330

331 **Fig. 4: The conservation and structure of HMO utilization loci in *Roseburia*.** (a) Global abundance of GH112,  
332 GH136<sub>I</sub>, GH136<sub>II</sub> and GH10 xylanase genes in 4599 *Roseburia* genomes. (b) Heatmap showing the segregation of  
333 GH112 containing genomes from (a) into different species-level genome bins (SGBs) and the corresponding relative  
334 abundance patterns of HMO utilization proteins within each SGB. (c) Principal component analysis of 1397 *Roseburia*  
335 gene landscapes defined stringently based on >70% identity to the GH112 with any of the 5 references *Roseburia*  
336 genomes (Supplementary Fig. 1) and including 10 proteins up and downstream of the GH112. (d) The composition of  
337 gene landscapes defined in (c) viewed as the occurrence frequency relative to GH112 genes. The gene landscape  
338 analyses (c-d) were performed using an automatic annotation pipeline, which differentiated between two different ABC-  
339 transporter solute binding proteins (SBPs) in the core HMO locus. The *R. inulinivorans* GH136 sequences are likely to  
340 be under estimated due to their divergence from canonical lacto-*N*-biosidase counterparts e.g. from *Roseburia hominis*  
341 characterized in this study. The HMO utilization loci are defined by genes encoding at least one GH112, a GH136, an  
342 ABC-transporter, and a transcriptional regulator.

## 343 Discussion

344 Perturbation of the early life HGM assembly is associated with life-long effects on the immune-  
345 and metabolic homeostasis of the host<sup>9-12</sup>. Breastfeeding is a key affector of the dynamics of the  
346 microbiota during infancy. Weaning marks a dramatic transition towards an adult-like structure of  
347 the HGM, which matures at the age of 2-3 and exhibits high resilience throughout adulthood<sup>7,8,22</sup>.

348 The critical window that precedes the maturation of the microbiota offers a unique opportunity for  
349 therapeutic interventions to address aberrant HGM states and thereby to prevent dysbiosis-  
350 related chronic disorders. To date, insight into the compositional signatures that characterize the  
351 assembly of the microbiota during infancy<sup>6-8</sup> is available, but the underpinning mechanisms,  
352 especially during weaning, remain largely unknown. Here, we describe previously unknown  
353 pathways that confer the growth of butyrate producing Clostridiales on distinct HMO motifs and  
354 related oligomers from host glyco-conjugates. These pathways correlate to the early colonization  
355 by Clostridiales associated with the healthy HGM and with the protection from metabolic and  
356 inflammatory disorders as well as colorectal cancer<sup>24-26,33</sup>.

### 357 The protein apparatus that confers the metabolism of HMO motifs and related glyco- 358 conjugate oligomers in butyrate producing Firmicutes of the HGM

359 We uniquely demonstrate that key butyrate producing *Roseburia* and *Eubacterium* spp. grow on  
360 complex HMOs purified from mother's milk and on defined HMO motifs (Fig. 1a-c). Proteomic  
361 analyses revealed two highly upregulated genetic loci that encode distant homologs to a lacto-*N*-  
362 biosidase from *B. longum*<sup>28,29</sup>, GNB/LNB phosphorylases and ABC transporters in *R. hominis*  
363 and *R. inulinivorans*, (Fig. 1f-g and Supplementary Fig. 1). Our analyses (Fig.1 and 2,  
364 Supplementary Fig. 6, Table 1, Supplementary Tables 2, 3, 4 and 5) established that the locus of  
365 *R. hominis* supports growth on the HMO motifs LNT and LNB, whereas the *R. inulinivorans* locus  
366 confers growth on more complex HMOs, e.g. single and double fucosylated versions of LNT (Fig.  
367 2a and Supplementary Fig. 6a-d). This specialization on different, but partially overlapping, HMOs  
368 and related Lewis a and Lewis b antigen oligomers from glyco-lipids or glyco-proteins creates  
369 differential competitive catabolic niches. This specialization is evident from the divergence of the  
370 GH136 specificities. Thus, *RhLnb136* and *ErLnb136* are lacto-*N*-biosidases, whereas *RiLe<sup>a/b</sup>136*  
371 displays an unprecedented specificity that requires a Fuc- $\alpha$ -(1 $\rightarrow$ 4)-GlcNAc at the proximal  
372 glycone subsite (subsite -1) and accommodates additional fucosylation at the -2, and +2 subsites  
373 (Fig. 2, Supplementary Fig. 6a and Supplementary Table 4). The preference to fucosylation is  
374 consistent with an open active site effectuated by shortening of loops, (*ErLnb136*: Loop 1 AA 330-  
375 341, Loop 2 AA 520-543, Supplementary Fig. 9c), which allows the accommodation of bulky  
376 fucosylated substrates. Remarkably, the GH136<sub>i</sub> subunits (or domains in *ErGH136*-like enzymes)  
377 are co-evolved with the GH136<sub>ii</sub> counterparts that possess the catalytic residues (Supplementary  
378 Fig. 9d).

379 Our stability (Supplementary Fig. 8c), structural (Fig. 3 and Supplementary Fig. 9), biochemical  
380 (Supplementary Fig. 8, Supplementary Table 4) and phylogenetic analyses (Supplementary Fig.  
381 9d) affirm the crucial role of the GH136<sub>i</sub> domain in the functionality of GH136 enzymes and provide  
382 the first insight into the association of the two GH136 domains. The sequence conservation of  
383 GH136<sub>i</sub> and GH136<sub>ii</sub> was mapped on the structure of *ErLnb136*. Strikingly, highly conserved  
384 patches were identified across both domains (Supplementary Fig. 9e). Particularly, parts of the  
385  $\alpha$ 4- $\alpha$ 5 loop and of the  $\alpha$ 5 helix in *ErLnb136<sub>i</sub>* that pack extensively onto *ErLnb136<sub>ii</sub>* display globally  
386 conserved residues, together with the complementary co-conserved regions of *ErLnb136<sub>ii</sub>*

387 (Supplementary Fig. 9e). Moreover, the surface of *ErLnb136<sub>I</sub>* is positively charged and apolar at  
388 the interface with *ErLnb136<sub>II</sub>*, which is notably different from the negative potential on the surface  
389 of the rest of the enzyme (Supplementary Fig. 9f) and complementary to the interface surface of  
390 *ErLnb136<sub>II</sub>*. These results highlight the co-evolution of GH136 subunits or domains.

391 ABC transporters are a determinant of uptake selectivity and competitiveness in both  
392 bifidobacteria<sup>17,34,35</sup> and *Roseburia intestinalis*<sup>32</sup>. The two SBPs of the ABC importers located in  
393 the HMO loci of *R. hominis* and *R. inulinivorans* were within the top 5 upregulated proteins in each  
394 proteome in response to HMO utilization (Fig. 1), underscoring the critical role of oligosaccharide  
395 transport in the competitive gut niche. The preferences of the SBPs and GHs encoded by these  
396 loci appear aligned to confer efficient uptake and subsequent catabolism of preferred substrates  
397 (Fig. 2 and Supplementary Fig. 6, Table 1). The LNB/GNB phosphorylases of GH112 are also  
398 conserved in the HMO loci (Supplementary Fig. 1). *R. inulinivorans* possesses additional  
399 CAZymes, notably different fucosidases for degradation of internalized fucosylated-oligomers  
400 (Supplementary Fig. 1 and 6b-d). Based on the proteomic analyses and the biochemical data,  
401 we propose a model for the two distinct routes for uptake and depolymerisation of HMOs in  
402 *Roseburia* and *Eubacterium* (Fig. 5 and Supplementary Fig. 2).

#### 403 **Conserved HMO utilization loci correlate to early colonization and resilience of** 404 **Clostridiales from *Roseburia* and *Eubacterium***

405 Butyrate producing bacteria of the *Roseburia-Eubacterium* group (Clostridiales order) are early  
406 colonizers of the infant gut<sup>6,8,36</sup> and are prevalent members of the adult HGM<sup>22,23</sup>.

407 The origin of this taxonomic group is enigmatic, but their presence in the human milk microbiome  
408 has been reported<sup>37,38</sup>. Orthogonal transfer from mothers based on the identification of the same  
409 *Roseburia* strains in mothers faeces, milk and the infant guts<sup>39</sup> has also been proposed. *R.*  
410 *intestinalis* type strains have been isolated from infant faeces<sup>40</sup>, hinting the presence of this taxon  
411 before full transition to solid food. The pathways we have elucidated explain, at least partially, the  
412 association between HMO utilization and the early colonization of butyrate producing *Roseburia*  
413 and *Eubacterium*.

414 We have previously shown that the abundance of distinct bifidobacteria in guts of breast-fed  
415 infants is strongly correlated to efficient ABC transporters that capture the 2'- and 3'-fucosyl-  
416 lactose HMOs with high affinity ( $K_D \approx 5 \mu\text{M}$ )<sup>17</sup>. The strains possessing these genes, e.g. from  
417 *Bifidobacterium longum* subspecies *infantis*, are not detected after weaning, as opposed to  
418 counterparts adept at utilizing plant-derived glycans. By contrast, the same *Clostridium* group  
419 XIVa strains that possess plant glycan utilization pathways<sup>32,41,42</sup> retain HMO catabolic pathways.  
420 The simultaneous growth of *R. hominis* on LNT and the plant derived xylotetraose  
421 (Supplementary Fig. 5) demonstrates this catabolic plasticity, which likely confers competitive  
422 advantages during weaning.

423 The loci that target HMOs also mediate cross-feeding on mucin or other glyco-conjugate  
424 oligomers, e.g. GNB from mucin and blood antigen structures, both captured efficiently by  
425 *Roseburia* transport proteins (Table 1). This is consistent with the significant butyrate production  
426 measured in co-cultures of *Roseburia* and *A. muciniphila*<sup>30</sup> (Supplementary Fig. 7c) and the  
427 upregulation of GH136-containing loci in the mucin co-culture and HMO monocultures (Fig 1 and  
428 Supplementary Fig. 7g). *R. inulinivorans* possesses an extensive mucolytic machinery revealed  
429 by the upregulation a fucose, a sialic acid (Supplementary Fig. 3) and a blood group A and B-  
430 locus (Supplementary Fig. 7h-j, Supplementary Table 9) that allows the release of  $\beta$ -(1→4)-linked

431 blood group oligomers found in mucin and glyco-lipids on the surfaces of enterocytes<sup>43,44</sup>. This  
432 ability to access carbohydrates from mucin and host glyco-conjugates supports growth during  
433 periods of nutritional perturbations, which may increase the resilience of this taxonomic group.

434 Our metagenomics analyses establish that HMO utilization appears to be a core trait within  
435 *Roseburia*, based on the ubiquitousness of loci harboring GH112 and GH136 genes (Fig. 4). The  
436 presence of SGBs that exclusively possess GH112 genes (e.g. SGBs 4921 and 4939, Fig. 4b)  
437 suggests that distinct strains are secondary degraders that cross-feed on released simple  
438 substrates, e.g. LNB and GNB. By contrast, the balanced occurrence of GH112 and GH136 genes  
439 (Fig. 4b) offers a signature for primary degraders that are able to access more complex glycans  
440 from HMOs or host glyco-conjugates.

441 In conclusion, the present study sets the stage for a mechanistic understanding of the assembly  
442 of core physiologically important groups in the early life microbiota and discloses previously  
443 unknown roles of HMOs in selection of Clostridiales. Additional studies are required to further  
444 address the paramount, but poorly understood maturation of the early life microbiota.

445

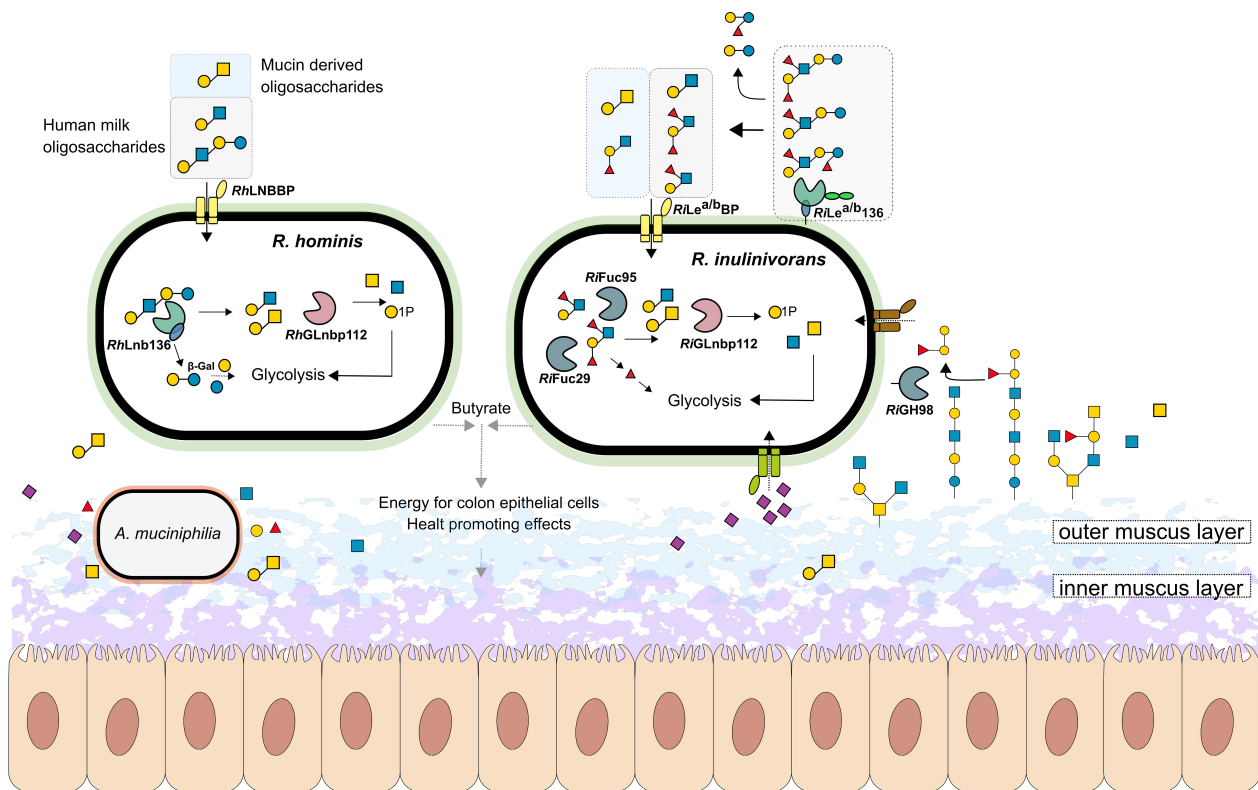

446

447 **Fig. 5: Model for HMOs and related host glycan utilization by *Roseburia* and other Lachnospiraceae.** In *R.*  
448 *hominis* the HMOs blocks LNT and LNB and the mucin derived GNB are captured by *RhLNBBP* for uptake into the  
449 cytoplasm and LNT is subsequently hydrolyzed to LNB. Both LNB and GNB are phosphorylated by *RhGLnbp112* into  
450  $\alpha$ -D-galactose-1-phosphate and the corresponding *N*-acetylhexosamines GlcNAc and GalNAc, respectively. Lactose is  
451 likely hydrolysed by a canonical  $\beta$ -galactosidase. *R. inulinivorans* specializes on different HMO blocks and structurally  
452 overlapping oligomers from glyco-lipids or glyco-proteins. Initial hydrolysis of HMOs or O-glycans from glyco-  
453 lipids/proteins occurs at the outer cell surface of *R. inulinivorans* by the activity of *RiLe<sup>a/b</sup>136*, which has two C-terminal  
454 putative galactose-binding domains. The capture and import of degradation products is mediated by *RiLe<sup>a/b</sup>BP* and the  
455 associated ABC transporter. In the cytoplasm, fucosyl decorations are removed by the concerted activity of *RiFuc95* and



456 *RiFuc29* before *RhGLnbp112* phosphorylates the resulting LNB or imported GNB into monosaccharides, as described  
457 in *R. hominis*. The galactose and galactose-1-phosphate products are converted via the Leloir pathway to glucose-6-  
458 phosphate and *N*-acetylhexosamine sugars are converted to GlcNAc-6-phosphate before entering glycolysis. The  
459 pyruvate generated from glycolysis is partly converted to butyrate<sup>45</sup>. To make the model more appropriate *Roseburia*  
460 is presented in its ecological niche, the outer mucus layer<sup>46</sup>, together with *Akkermansia muciniphilia* as model mucin  
461 degrader. The ability of *R. inulinivorans* to cross-feed on sialic acid and to directly access host glycans is illustrated by  
462 the presence of the sialic acid uptake and catabolism machinery and by *RiGH98*, cleaving  $\beta$ -(1→4)-linked blood group  
463 A and B oligosaccharides from mucin and glyco- lipids/proteins. Black solid arrows show enzymatic steps established  
464 or confirmed in this study. Black dotted arrows indicate steps based on literature. Grey dotted arrows indicate butyrate  
465 production by *R. hominis* and *R. inulinivorans* from mucin in co-culture with *A. muciniphilia*. The glycan structure key is  
466 the same as in Fig. 1.

467

468

469

470

471

472

## 473 **Material and Methods:**

474

### 475 Resources: Chemicals and Carbohydrates:

476

477 Human milk and blood antigen oligosaccharides used in this study are described in Table S1. *N*-  
478 acetylneuraminic acid (Neu5Ac),  $\alpha$ -D-galactose-1-phosphate (Gal1P) and  $\alpha$ -L-fucose (Fuc) were  
479 from Carbosynth and xylotetraose was from Megazyme. Galactose (Gal), Glucose (Glc), *N*-  
480 acetylglucosamine (GlcNAc), *N*-acetylgalactosamine (GalNAc) and porcine gastric mucin type III,  
481 (PGM) were from Sigma Aldrich. Bovine submaxillary mucin (BSM) was from VWR. 2-  
482 aminoanthranilic acid (2-AA) was from Nacalai Tesque and purified human milk samples were  
483 prepared from mother milk from Hvidovre hospital (Hvidovre, Denmark). All chemicals were of  
484 analytical grade unless otherwise stated.

### 485 Method Details:

#### 486 **Enzymatic production of LNB and GNB**

487 LNB and GNB for growth were produced enzymatically with the GH112 galacto-*N*-biose/lacto-*N*-  
488 biose phosphorylase (EC 2.4.1.211) from *R. hominis* (*RhGLNbp112*). In detail, 100 mM Gal1P  
489 and 300 mM corresponding *N*-acetylhexosamine (GlcNAc or GalNAc) in 50 mM MES, 150 mM  
490 NaCl, pH 6.5 were incubated with 10  $\mu$ M *RhGLNbp112* for 36 h at 30°C. After incubation, 2.5  
491 volumes of ice-cold ethanol (99 %) were added, samples were incubated at – 20°C for 2 h and  
492 centrifuged (10.000x *g*, 30 min at 4°C) to remove the enzyme. Supernatants were up concentrated  
493 by rotary evaporation and disaccharides were desalted in ultrapure water (milliQ) using a HiPrep  
494 Desalt column (GE Healthcare, Denmark) on an Äkta avant chromatograph (GE Healthcare).  
495 Elution was monitored by measuring  $A_{235\text{ nm}}$  and pooled fractions were freeze dried. Further  
496 purification was accomplished by high-performance liquid chromatography (HPLC) (UltiMate  
497 3000, Dionex) using a TSKgel® Amide 80 column (4.6 x 250 mm) and a TSKgel® Amide 80 guard  
498 column (4.6 x 10 mm) (VWR) by loading LNB or GNB dissolved in the mobile phase (75% (v/v)  
499 acetonitrile, ACN) and an isocratic elution at 1 mL min<sup>-1</sup>. Purity of collected fractions (2 mL) was  
500 analyzed by thin layer chromatography (TLC) using 5 mM standards of GalNAc, GlcNAc, Gal1P  
501 and LNB/GNB. Fractions containing pure LNB/GNB were pooled, ACN was removed by speed  
502 vacuum evaporation and samples were lyophilized until further use.

#### 503 **Purification of human milk oligosaccharides**

504 Human milk oligosaccharides (HMOs) were purified from pooled human milk samples as  
505 previously described<sup>47,48</sup>. Milk fat was separated by centrifugation (10.000x *g*, 30 min at 4°C) and  
506 proteins were removed by ethanol precipitation (as above). The supernatant was up concentrated  
507 by rotary evaporation, buffered with 2 volumes 100 mM MES, 300 mM NaCl, pH 6.5 and lactose  
508 was digested with  $\beta$ -galactosidase from *Kluyveromyces lactis* (Sigma Aldrich) (20 U mL<sup>-1</sup>, 3 h  
509 at 37°C). The enzyme was precipitated with ethanol (as before) and the supernatant was  
510 concentrated by rotary evaporation. Residual lactose and monosaccharides were removed by  
511 solid-phase extraction (SPE) using 12 mL graphitized Supelclean™ ENVI-Carb™ columns  
512 (Supelco) with a bed weight of 1 g. For SPE, columns were activated with 80% (v/v) ACN  
513 containing 0.05% (w/v) formic acid (FA) and equilibrated with buffer A (with 4% (v/v) ACN, 0.05%

514 (w/v) FA), which was also used to dilute the samples prior to loading. After sample loading, the  
515 columns were washed (6 column volumes of buffer A) to remove lactose and monosaccharides  
516 before oligosaccharides were eluted with 40% (v/v) ACN, 0.05% (w/v) FA. Eluted  
517 oligosaccharides were concentrated in a speed vacuum concentrator, freeze-dried and dissolved  
518 in milliQ prior to usage.

519 Purity of HMOs was verified by high performance anion exchange chromatography with pulsed  
520 amperometric detection (HPAEC-PAD) on an ICS-5000 (Dionex) system with a 3 × 250 mm  
521 CarboPac PA200 column (Theromofisher), a 3 × 50 mm CarboPac guard column  
522 (Theromofisher) and 10 µL injections. HMOs were eluted with a stepwise linear gradient of  
523 sodium acetate: 0-7.5 min of 0-50 mM, 7.5-25 min of 50-150 mM and 25-35 min of 150-400  
524 mM, at a flow rate of 0.35 mL min<sup>-1</sup> and a mobile phase of constant 0.1 mM NaOH. Standards  
525 (0.01-0.5 mM) of lactose, galactose and glucose in milliQ were used to quantify these residual  
526 sugars as described above. The analysis was performed in triplicates and the residual content  
527 of these sugars was <2 % (w/w) of the purified HMO mixture.

### 528 **Isolation and purification of porcine mucins**

529 The commercial porcine gastric mucin (PGM) was further purified<sup>49</sup>. In short, 20 g PGM was  
530 stirred for 20 h at 25°C in 20 mM phosphate buffer, 100 mM NaCl, pH 7.8 (adjusted to pH 7.2  
531 after the first 2 hours using 2 M NaOH). Insoluble residues were removed by centrifugation  
532 (10,000x g, 30 min at 4°C) and soluble mucin was precipitated by the addition of 3 volumes of ice  
533 cold ethanol (99%) and incubation for 18 h at 4°C. Precipitated mucin was dialyzed 5 times against  
534 200 volumes milliQ for 16 h at 4°C, using a 50 kDa molecular weight cut off membrane (Spectra,  
535 VWR) and afterwards freeze dried.

536 Porcine colonic mucin was isolated from five fresh pig colons from the slaughterhouse of Danish  
537 Crown (Horsens, Denmark). Pig colons were processed at site and immediately placed on dry ice  
538 to ensure quick cooling during transport. Colons were opened longitudinally and content was  
539 removed mechanically and by washing with ice cold 0.9% (w/v) NaCl until no digesta was visible.  
540 Cleaned luminal surface was quickly dried with absorptive paper and the mucosa was scraped  
541 off with a blunt metal spatula and subsequently transferred into a pre-cooled glass beaker  
542 whereby visible fat was removed and discarded. Mucin was then purified as previously  
543 described<sup>50</sup>. Isolated mucin was immersed in 10 volumes extraction buffer (10 mM sodium  
544 phosphate buffer, 6 M guanidine hydrochloride (GuHCl), 5 mM Ethylenediaminetetraacetic acid  
545 (EDTA), 5 mM *N*-ethylmaleimide, pH 6.5) and gently stirred overnight at 4°C. Soluble impurities  
546 and floating fat were separated by centrifugation (10,000x g, 30 min at 4°C), pelleted mucin was  
547 dissolved in 10 volumes extraction buffer and incubated for 3 h at room temperature again.  
548 Soluble impurities were removed by centrifugation as described before. Short incubation (3 h)  
549 extraction steps were repeated 7 times until the supernatant was clear for at least two repeated  
550 extractions. Afterwards insoluble mucin was solubilized by reduction in 0.1 M Tris, 6 M GuHCl,  
551 5mM EDTA, 25 mM dithiotreitol (DTT) pH 8, for 5 h at 37°C and subsequent alkylation through  
552 the addition of 65 mM iodoacetamide and incubation in the dark for 18 h at 4°C. Soluble mucin  
553 was dialyzed 6 times against 200 volumes milliQ using a 50 kDa MWCO dialysis bag for 6 h at  
554 4°C and freeze dried.

### 555 **Cloning, expression and purification of proteins**

556 Open reading frames encoding proteins from *R. hominis* DSM 16839, *R. inulinivorans* DSM 16841  
557 and *E. ramulus* DSM 15684 were cloned without signal peptide or transmembrane domain from

558 genomic DNA using In-Fusion cloning (Takara) and the primers in Table S8 into the EcoRI and  
559 NcoI restriction sites of the corresponding plasmids, to encode proteins with either a cleavable N-  
560 or C- terminal His<sub>6</sub> tag. The pETM 11 plasmid was used (from G. Stier, EMBL, Center for  
561 Biochemistry, Heidelberg, Germany)<sup>51</sup>, except for *RHOM\_04110* (*RhLnb136<sub>i</sub>*) and  
562 *ROSEINA2194\_01899* (*RiLe<sup>a/b</sup>136<sub>i</sub>*) which were cloned into pET15b (Novagen). Recombinant  
563 proteins were expressed in *E. coli* BL21  $\Delta$ *lacZ* (DE3)/pRARE2 (a kind gift from Prof. Takane  
564 Katayama, Kyoto University, Kyoto, Japan) and purified following standard protocols using His-  
565 affinity and size-exclusion chromatography. Mutants of *E. ramulus* *HMPREF0373\_02965*  
566 (*ErLnb136*) were constructed using QuickChange II Site-Directed Mutagenesis (Agilent) with  
567 pETM11\_ *HMPREF0373\_02965* as template. Primers used for site-directed mutagenesis are  
568 listed in Table S8 and mutants were produced as described above. L-Selenomethionine labelled  
569 protein expression of *ErLnb136* was performed by introducing the corresponding plasmid into *E.*  
570 *coli* B834 (DE3) and culturing the transformed cells in a synthetic M9 based medium of the  
571 SelenoMet labelling Kit (Molecular Dimensions) supplemented either with L-methionine or L-  
572 Selenomethionine (both to 50  $\mu$ g mL<sup>-1</sup>). The L-SeMet labelled protein was purified as described  
573 above.

574

575

576

### Growth experiments and single strain proteomics analysis

577 *R. hominis* DSM 16839, *R. inulinivorans* DSM 16841, *E. ramulus* DSM 15684 and *E. ramulus*  
578 DSM 16296 were grown anaerobically at 37°C using a Whitley DG250 Anaerobic Workstations  
579 (Don Whitley Scientific). *R. hominis* and *R. inulinivorans* were propagated in YCFA medium<sup>40</sup>  
580 while for *E. ramulus* strains CFA medium (modified YCFA medium lacking yeast extract to  
581 minimize *E. ramulus* growth on yeast extract) was used. Growth media were supplemented with  
582 0.5% (w/v) carbohydrates sterilized by filtration (soluble carbohydrates, 0.45  $\mu$ m filters) or  
583 autoclaving (mucins, 15 min at 121°C) and cultures were performed in at least biological triplicates  
584 unless otherwise indicated. Bacterial growth was monitored by measuring *OD*<sub>600 nm</sub> and pH (for  
585 co-culture experiments). For growth experiments performed in microtiterplates, a Tecan Infinite  
586 F50 microplate reader (Tecan Group Ltd) located in the anaerobic workstation was used and  
587 growth was followed by measuring *OD*<sub>595 nm</sub>.

588 For differential proteome analyses, *R. hominis* and *R. inulinivorans* were grown in 200  $\mu$ L YCFA  
589 (1.5 mL Eppendorf tubes) to mid-late exponential phase (*OD*<sub>600</sub> ~0.5-0.8) in four biological  
590 replicates. For *R. hominis* YCFA was supplemented with 0.5% (w/v) LNT or glucose and for *R.*  
591 *inulinivorans* 1% (w/v) HMOs or glucose was used as carbon source. Cells were harvested by  
592 centrifugation (5.000x *g*, 5 min at 4°C), washed twice with ice cold 0.9% (w/v) NaCl, resuspended  
593 in 20  $\mu$ L lysis buffer (50 mM HEPES, 6 M GuHCl, 10 mM Tris(2-carboxyethyl)phosphine  
594 hydrochloride (TCEP), 40mM 2-chloroacetamide (CAA) pH 8.5) and stored at -80°C for  
595 proteomics analysis.

596

### Co-culture cross-feeding experiment proteomics analyses

598 *R. hominis*, *R. inulinivorans* and *A. muciniphila* DSM 22959 were grown in 10 mL YCFA to mid-  
599 late exponential phase (*OD*<sub>600</sub> ~0.6-0.7). From these pre-cultures, equal amounts of cells (*OD*<sub>600</sub>)  
600 were used to inoculate 30 mL fresh YCFA medium with 1% (w/v) of a mucin mixture (0.6% (w/w)  
601 PGM, 0.2% (w/w) PCM, 0.2% (w/w) BSM) or 1% (w/v) glucose to a start *OD*<sub>600</sub> ~0.01. All cultures  
602 were performed in four biological replicates and growth was followed (*OD*<sub>600</sub> and pH) at 0, 6, 8,  
603 12, 16, 24, and 48 h. Samples (2 mL) were collected for proteomics analyses after 16 h and for

604 SCFA quantification after 24 and 48 h. Samples were immediately cooled on ice and cells were  
605 harvested by centrifugation (5000x g, 10 min at 4°C). For proteomics, cell pellets were washed  
606 twice with ice cold 0.9% (w/v) NaCl, resuspended in 60 µL lysis buffer and stored at -80°C until  
607 proteomics analysis. Collected culture supernatants for SCFA quantification were sterile filtrated  
608 (0.45 µm filters) and stored at -80°C for further analysis.

### 609 **Protein extraction and sample preparation for mass spectrometry**

610 Samples were processed as described elsewhere<sup>52,53</sup>. Cells were lysed by boiling (5 min 95°C)  
611 followed by bead beating (3mm beads, 30 Hz for 1 min) (TissueLyser II, Qiagen) and sonication  
612 bath (3x 10 sec at 4°C) (Bioruptor, Diagenode). Lysates were centrifuged (14.000x g, 10 min at  
613 4°C) and soluble protein concentrations were determined by a Bradford assay (Thermo Fisher  
614 Scientific). For digestion, 20 µg protein were diluted 1:3 with 50 mM HEPES, 10% (v/v) ACN, pH  
615 8.5 and incubated with LysC (MS grade, Wako) in a ratio of 1:50 (LysC:protein) for 4 h at 37°C.  
616 Subsequently, samples were diluted to 1:10 with 50 mM HEPES, 10% (v/v) ACN, pH 8.5 and  
617 further digested with trypsin (MS grade, Promega) in a ratio of 1:100 for 18 h at 37°C. Next,  
618 samples were diluted 1:1 with 2% (w/v) trifluoroacetic acid (TFA) to quench enzymatic activity and  
619 peptides were processed for mass spectrometry using in house packed stage tips<sup>54</sup> as described  
620 below.

621 Peptides from single strain cultures were desalted using 3 discs of C18 resin packed into a 200  
622 µL tip and activated by successive loading of 40 µL of MeOH and 40 µL of 80% (v/v) ACN, 0.1%  
623 (w/v) FA by centrifugation at 1800x g and equilibrated twice with 40 µL of 3% (v/v) ACN, 1% (w/v)  
624 FA before samples were loaded in steps of 50 µL. After loading, tips were washed three times  
625 with 100 µL 0.1% (w/v) TFA and peptides were eluted in two steps with 40 µL each of 40% (v/v)  
626 ACN, 0.1% (w/v) FA into a 0.5 mL Eppendorf LoBind tube. Peptides derived from co cultures were  
627 desalted and fractionated using strong cation exchange (SCX) chromatography filter pugs (3M  
628 Empore). Per sample, 6 SCX discs were packed into a 200 µL tip and tips were activated and  
629 equilibrated by loading 80 µL (v/v) of ACN and then 80 µL of 0.2% (w/v) TFA. Samples were  
630 applied in 50 µL steps and tips were washed twice with 600 µL 0.2% (w/v) TFA. Subsequently  
631 peptides were stepwise eluted in 3 fractions with 60 µL of 125 mM NH<sub>4</sub>OAc, 20% (v/v) ACN, 0.5%  
632 (w/v) FA, then with 60 µL of 225 mM NH<sub>4</sub>OAc, 20% (v/v) ACN, 0.5% (w/v) FA and lastly with 5%  
633 (v/v) NH<sub>4</sub>OH, 80 % (v/v) ACN into 0.5 mL Eppendorf LoBind tubes. Eluted peptides were dried in  
634 an Eppendorf Speedvac (3 h at 60°C) and reconstituted in 2% (v/v) ACN, 1% (w/v) TFA prior to  
635 mass spectrometry (MS) analysis.

### 636 **LC-MS/MS**

637 Peptides from biological triplicates of each culture condition were loaded on the mass  
638 spectrometer by reverse phase chromatography through an inline 50 cm C18 column (Thermo  
639 EasySpray ES803) connected to a 2 cm long C18 trap column (Thermo Fisher 164705) using a  
640 Thermo EasyLc 1000 HPLC system. Peptides were eluted with a gradient of 4.8–48 % (v/v) ACN,  
641 0.1% (w/v) FA at 250 nL min<sup>-1</sup> over 260 min (samples from single strain cultures) or 140 min (SCX  
642 fractionated samples from co cultures) and analysed on a Q-Exactive instrument (Thermo Fisher  
643 Scientific) run in a data-dependent manner using a “Top 10” method. Full MS spectra were  
644 collected at 70,000 resolution, with an AGC target set to 3x10<sup>6</sup> ions or maximum injection time of  
645 20 ms. Peptides were fragmented via higher-energy collision dissociation (normalized collision  
646 energy=25). The intensity threshold was set to 1.7x10<sup>6</sup>, dynamic exclusion to 60 s and ions with  
647 a charge state <2 or unknown species were excluded. MS/MS spectra were acquired at a

648 resolution of 17,500, with an AGC target value of  $1 \times 10^6$  ions or a maximum injection time of 60  
649 ms. The scan range was limited from 300–1750 m/z.

650

### 651 **Protein identification and Label-free quantification and relative abundance in co-culture** 652 **communities**

653 Proteome Discoverer versions 2.2 & 2.3 were used to process and analyze the raw MS data files  
654 and label free quantification was enabled in the processing and consensus steps. The spectra  
655 from single strains proteomics were matched against the proteome database of *R. hominis* DSM  
656 16839 (ID: UP000008178) or *R. inulinivorans* DSM 16841 (ID: UP000003561) respectively, as  
657 obtained from Uniprot. The spectra from co-culture experiments were searched against a  
658 constructed database consisting of the reference proteomes of the two *Roseburia* strains (as  
659 above) and *A. muciniphila* DSM 22959 (ID: UP000001031). For spectral searches, oxidation (M),  
660 deamidation (N, Q) and N-terminal acetylation were specified as dynamic modifications and  
661 cysteine carbamidomethylation was set as a static modification. Obtained results were filtered to  
662 a 1% FDR and protein quantitation was done by using the built-in Minora Feature Detector. For  
663 analysis of the label-free quantification data, proteins were considered present if at least 2 unique  
664 peptides (as defined in Proteome Discoverer) were identified and proteins had to be identified in  
665 at least 2 out of the 3 samples analyzed per culture condition with high confidence.

666 Relative bacterial abundance in co-cultures was estimated based on strain unique peptides  
667 identified with Unipept version 4.0<sup>55</sup>. To exclude peptides shared between closely related strains  
668 from the analyses, all peptide sequences quantified via Proteome Discoverer were imported into  
669 the Unipept web server and analyzed with the settings “Equate I and L” and “Advanced missed  
670 cleavage handling” activated. The normalized sum of intensities of the resulting taxonomically  
671 distinctive peptides was then used for assessing relative abundances of each strain.

### 672 **Butyrate quantification**

673 Butyrate in culture supernatants was quantified by HPLC coupled to a refracting index detector  
674 (RID) and diode array detector (DAD) on an Agilent HP 1100 system (Agilent). Standards of  
675 butyric acid (0.09-50 mM) were prepared in 5 mM H<sub>2</sub>SO<sub>4</sub> for peak identification and quantification.  
676 Samples from 4 biological replicates were analysed by injecting 20 µL of standard or filtrated (0.45  
677 µM filter) culture supernatant on a 7.8 x 300 mm Aminex HPX-87H column (Biorad) combined  
678 with a 4.6 x 30 mm Cation H guard column (Biorad). Elution of was performed with a constant  
679 flow rate of 0.6 mL min<sup>-1</sup> and a mobile phase of 5 mM H<sub>2</sub>SO<sub>4</sub>. Standards were analysed as above  
680 in technical triplicates.

### 681 **Oligosaccharide uptake preference of *R. hominis***

682 *R. hominis* was grown anaerobically in 250 µL YCFA medium with 0.5% (w/v) of an equal mixture  
683 of xylotetraose and LNT in biological triplicates. Samples (20 µL) were taken after 0, 3.5, 5.5,  
684 6.5, 8, 9.5 and 24h, diluted 10-fold in ice cold 100 mM NaOH and centrifuged (10 min at 5000x  
685 g at 4°C) before supernatants were stored at -20°C until the HPAEC-PAD analysis. Standards  
686 of 0.5 mM xylotetraose and LNT were prepared in 100 mM NaOH and used to identify  
687 corresponding peaks in the chromatograms. Samples or standard were injected (2 µL  
688 injections) on a 4 × 250 mm CarboPac PA10 column with a 4 × 50 mm CarboPac guard column

689 and eluted isocratically (0.750 mL min<sup>-1</sup>, 100 mM NaOH, 10mM NaOAc). The analysis was  
690 performed from a biological triplicate and standards were analyzed in technical duplicates.

691

## 692 Enzyme activity assays

693 Enzymatic activity assays were carried out in 50 mM MES, 150 mM NaCl, 0.005% (v/v) Triton X-  
694 100, pH 6.5 standard assay buffer and in triplicates unless otherwise stated.

695 Hydrolysis kinetics and specific activities of the GH136 lacto-*N*-biosidases were measured using  
696 a coupled enzymatic assay to monitor lactose release. The lactose was hydrolyzed with a β-  
697 galactosidase (used above) and the resulting glucose was oxidized with a glucose oxidase (Sigma  
698 Aldrich) concomitant with the production of H<sub>2</sub>O<sub>2</sub> measured by coupling to horseradish peroxidase  
699 (Sigma Aldrich) oxidation of 4-aminoantipyrine and 3,5-dichloro-2-hydroxybensensulfonic acid.  
700 Reactions were prepared in 96-well microtiter plates to a final volume of 150 μL, containing  
701 substrate, lacto-*N*-biosidase, β-galactosidase (150U mL<sup>-1</sup>), glucose oxidase (150U mL<sup>-1</sup>),  
702 horseradish peroxidase (150U mL<sup>-1</sup>), 10 mM 3,5-dichloro-2-hydroxybensensulfonic acid, 1 mM 4-  
703 aminoantipyrine in standard assay buffer. Reactions were performed at 37°C and  $A_{515\text{ nm}}$  was  
704 measured in 5 sec intervals for 30 min. Blanks were prepared by substituting lacto-*N*-biosidase  
705 with standard assay buffer in the reaction mixture and a lactose standard (3 μM–500 μM) was  
706 used for the quantification.

707 Hydrolysis kinetics of *Rh*Lnb136 (40 nM) and *Er*Lnb136 (10 nM) towards LNT (0.2–5 mM for  
708 *Rh*Lnb136 and 0.1–2.5 mM for *Er*Lnb136) were determined as described above. The kinetic  
709 parameters  $K_M$  and  $k_{cat}$ , were calculated by fitting the Michaelis-Menten equation to the initial rate  
710 data using OriginPro 2018b (OriginLab). Lacto-*N*-biosidase specific activity of *Ri*Le<sup>a/b</sup>136 (1.2 μM)  
711 was measured as described above using 3.5 mM LNT. The specific activity was expressed in  
712 units (U) mg<sup>-1</sup> enzyme, where a unit is defined as the amount of enzyme that releases 1 μmol  
713 lactose min<sup>-1</sup> quantified as above.

714 Specific activities of *Rh*GLnbp112 and *Ri*GLnbp112 towards LNB and GNB were assayed 50 mM  
715 sodium phosphate buffer, 150 mM NaCl, 0.005% (v/v) Triton X-100, pH 6.5. Reactions (150 μL)  
716 were incubated for 10 min at 37°C with 20 nM enzyme and 2 mM substrate. Aliquots of 15 μL  
717 were removed every minute and quenched in 135 μL 0.2 M NaOH. Standards of Gal1P (5  
718 mM–0.02 mM) were prepared in 0.2 M NaOH and were used to quantify the concentrations of  
719 released Gal1P in the quenched reaction samples. Both, quenched reactions and standards were  
720 examined by HPAEC-PAD using a 3 × 250 mm CarboPac PA200 column (Theromofisher) in  
721 combination with a 3 × 50 mm CarboPac guard column (Theromofisher) and 10 μL injections.  
722 Elution was performed with a flow of 0.350 mL min<sup>-1</sup> and a mobile phase of 150 mM NaOH  
723 and 60 mM sodium acetate. The specific activity was expressed in U mg<sup>-1</sup> enzyme, where a U is  
724 defined as the amount of enzyme that releases 1 μmol Gal1P min<sup>-1</sup>. The analysis was performed  
725 in technical triplicates.

## 726 Enzyme product profiles

727 Enzyme assays were performed at 37°C for 16 h in standard assay buffer or in the phosphate  
728 version (instead of MES) for GH112 enzymes. Degradation products were analyzed by thin layer  
729 chromatography (TLC) and or Matrix-assisted laser desorption/ionization time of flight mass  
730 spectroscopy (MALDI-TOF/MS) as described below.

### 731 **Thin layer chromatography**

732 The TLC was performed by spotting 2  $\mu$ L of enzymatic reaction on a silica gel 60 F454 plate  
733 (Merck), the separation was carried out in butanol: ethanol: milliQ water (5:3:2) (v/v) as mobile  
734 phase and sugars were visualized with 5-methylresorcinol:ethanol:sulfuric acid (2:80:10) (v/v)  
735 and heat treatment except for *RiLe<sup>a/b</sup>*136. The TLC for the latter enzyme was performed in  
736 butanol:acetic acid: milliQ (2:1:1) (v/v) and developed with diphenylamine-phosphoric acid  
737 reagent<sup>56</sup>.

738

### 739 **MALDI-TOF/MS**

740 MALDI-TOF/MS analysis of *RiLe<sup>a/b</sup>*136 was accordind to<sup>57</sup>, following permethylation of  
741 oligosaccharides<sup>58</sup>. Permethyated sugars were dried, mixed with 2,5-dihydroxybenzoic acid, and  
742 spotted onto the MALDI plate. For MALFI-TOF/MS analyses, a Bruker Autoflex III smartbeam in  
743 positive ion mode was used. Degradation products of *RhLnb*136 and *ErLnb*136 were analyzed  
744 without initial permethylation of oligosaccharides using 2,5-dihydroxybenzoic acid as matrix and  
745 an Ultraflex II TOF/TOF (Bruker Daltonics) instrument operated in positive ion linear mode. Peak  
746 analysis of mass spectra was performed using Flexanalysis Version 3.3 (Bruker Daltonics).

747

### 748 **LC-MS<sup>2</sup> of O-glycan derived oligosaccharides**

749 A homogenous preparation of porcine gastric mucin, PGM (Sigma), carrying blood group A, was  
750 used in the analysis. A total of 0.1 mg mucin per dot were immobilized by dot blotting onto an  
751 immobilon-P PVDF membranes (Immobilon P membranes, 0.45  $\mu$ m, Millipore, Billerica, MA).  
752 *RiGH98* was added to one dot to 1.5  $\mu$ M in 50  $\mu$ L and incubated for 1 h and 4 h at 37°C. The  
753 reaction supernatants which contained released free oligosaccharides, were collected and  
754 purified by passage through porous graphitized carbon (PGC) particles (Thermo Scientific)  
755 packed on top of a C18 Zip-tip (Millipore). Samples were eluted with 65% (v/v) ACN in 0.5%  
756 trifluoro-acetic acid (TFA, v/v), dried, resuspended in 10  $\mu$ L of milliQ, frozen at -20 °C and stored  
757 until further analysis. The residual O-linked glycans (on the dot) were released by reductive  $\beta$ -  
758 elimination by incubating the dot in 30  $\mu$ L of 0.5 M NaBH<sub>4</sub> in 50 mM NaOH at 50°C for 16 h  
759 followed by adding 1.5  $\mu$ L glacial acetic acid to quench the reaction. The released O-glycans were  
760 desalted and dried as described before<sup>59</sup>. The purified glycans were resuspended in 10  $\mu$ L of  
761 milliQ and stored at -20°C for further analysis. Released oligosaccharides from glycosphingolipids  
762 as a model substrate carrying blood group B (B5-2 and B6-2)<sup>60</sup> were prepared as described  
763 above, except for a single incubation time of 2 h.

764 Purified samples were analyzed by LC-MS/MS using 10 cm  $\times$  250  $\mu$ m I.D. column, packed in  
765 house with PGC 5  $\mu$ m particles. Glycans were eluted using a linear gradient of 0–40% ACN in 10  
766 mM NH<sub>4</sub>HCO<sub>3</sub> over 40 min at 10  $\mu$ l min<sup>-1</sup>. The eluted O-glycans were analyzed on a LTQ mass  
767 spectrometer (Thermo Scientific) in negative-ion mode with an electrospray voltage of 3.5 kV,  
768 capillary voltage of -33.0 V and capillary temperature of 300 °C. Air was used as a sheath gas  
769 and mass ranges were defined depending on the specific structure to be analyzed. The data were  
770 processed using Xcalibur software (version 2.0.7, Thermo Scientific).

771

### 772 **Oligosaccharide binding analysis**



773 Binding of LNT, LNB, GNB, H type I triose, Le<sup>a</sup> triose and Le<sup>b</sup> tetraose to *RiLe<sup>a/b</sup>BP* was analyzed  
774 by surface plasmon resonance (SPR; Biacore T100, GE Healthcare). *RiLe<sup>a/b</sup>BP*, diluted in 10 mM  
775 NaOAc buffer pH 3.75 to 50 µg mL<sup>-1</sup>, was immobilized on a CM5 chip using a random amine  
776 coupling kit (GE Healthcare) to a final chip density of 3214 and 4559 response units (RU). Analysis  
777 comprised 90 s for association and 240 s for dissociation phase, respectively, at a flow rate of 30  
778 µL min<sup>-1</sup>. Sensograms were recorded at 25°C in 20 mM sodium phosphate buffer, 150 mM NaCl,  
779 0.005% (v/v) P20 (GE Healthcare), pH 6.5. Experiments were performed in duplicates (each  
780 consisting of a technical duplicate) in the range of 0.3-50 µM for LNB, 0.78-200 µM for GNB,  
781 0.97-250 µM for Le<sup>a</sup>, 0.097 µM-100 µM for Le<sup>b</sup> and 1.5-250 µM for blood H type I triose. To  
782 investigate ligand specificity of *RiLe<sup>a/b</sup>BP*, binding was further tested towards 0.5 mM LNT, LNT,  
783 lactose, blood A triose, 2'FL and 3'FL. Equilibrium dissociation constants ( $K_D$ ) were calculated by  
784 fitting a one binding site model to steady state sensograms, using the Biacore T100 data  
785 evaluation software.

786 Binding of LNT, LNB, GNB, LNT, lactose and 2'FL to *RhLNBBP* was measured using a Microcal  
787 ITC<sub>200</sub> calorimeter (GE Healthcare). Titrations were performed in duplicates at 25°C with  
788 *RhLNBBP* (0.1 mM) in the sample cell and 1.5 mM ligand in 10 mM sodium phosphate buffer, pH  
789 6.5 in the syringe. A first injection of 0.4 µL was followed by 19 injections of 2 µL ligand each,  
790 separated by 180 s. Heat of dilution was determined from buffer titrations and corrected data were  
791 analyzed using MicroCal Origin software v7.0. To determine binding thermodynamics a non-linear  
792 single binding model was fitted to the normalized integrated binding isotherms.

### 793 **Differential scanning calorimetry (DSC)**

794 The DSC analyses was performed at protein concentrations of 1 mg mL<sup>-1</sup> in 20 mM sodium  
795 phosphate buffer, 150 mM NaCl, pH 6.5, using a Nano DSC (TA instruments). Thermograms  
796 were recorded from 10 to 90°C at a scan speed of 1°C min<sup>-1</sup> using buffer as reference. Baseline  
797 corrected data were analyzed using the NanoAnalyze software (TA instruments). DSC analyses  
798 were performed in duplicates unless otherwise states.

### 799 **Crystallization**

800 Crystals of *ErLnb136* proteins were grown at 20°C using the sitting-drop vapor diffusion method,  
801 by mixing 0.5 µL of a 10 mg mL<sup>-1</sup> protein solution with an equal volume of a reservoir solution.  
802 Native crystals were grown in a 20% (w/v) PEG4000, 0.1 M sodium citrate pH 5.6, and 20%  
803 isopropanol reservoir solution. SeMet-labelled crystals were grown using a reservoir solution  
804 containing 20% (w/v) PEG6000, 0.1 M Tris-HCl pH 8.5, and 1 M lithium chloride. The crystals  
805 were cryoprotected in the reservoir solution supplemented with 20% (v/v) glycerol and 25 mM  
806 LNB. The crystals were flash-cooled at 100 K (-173.15°C) in a stream of nitrogen gas. Diffraction  
807 data were collected at 100 K on beamlines at SLS X06DA (Swiss Light Source, Swiss) and Photon  
808 Factory of the High Energy Accelerator Research Organization (KEK, Tsukuba, Japan). The data  
809 were processed using HKL2000<sup>61</sup> and XDS<sup>62</sup>. Initial phase calculation, phase improvement, and  
810 automated model building were performed using PHENIX<sup>63</sup>. Manual model rebuilding  
811 and refinement was achieved using Coot<sup>64</sup> and REFMAC5<sup>65</sup>. Because the crystal structures of  
812 SeMet-labelled and native protein were virtually the same (root mean square deviations for the  
813 Cα atoms = 0.14 Å), we used the SeMet-labelled protein structure for the descriptions in the  
814 Results and Discussion. Molecular graphics were prepared using PyMOL (Schrödinger, LLC, New  
815 York) or UCSF Chimera (University of California, San Francisco)

## 816 **Bioinformatics**

817 SignalP v.4.1<sup>66</sup>, PSORTb v3.0<sup>67</sup>, TMHMM v.2.0<sup>68</sup> were used for prediction of signal peptides and  
818 transmembrane domains. InterPro<sup>69</sup> and dbCAN2<sup>70</sup> were used to analyse modular organization  
819 using default settings for Gram positive bacteria. Redundancy in biological sequence datasets  
820 was reduced using the CD-HIT server (sequence identity cut off = 0.95)<sup>71</sup>. Protein sequence  
821 alignments were performed using MAFFT (BLOSUM62)<sup>72</sup>. Phylogenetic trees were constructed  
822 using the MAFFT server, based on the neighbor-joining algorithm, and with bootstraps performed  
823 with 1000 replicates. Phylogenetic trees were visualized and tanglegrams constructed using  
824 dendroscope<sup>73</sup>. Coloring of protein structures according to amino acid sequence conservation  
825 was accomplished in UCSF Chimera, based on protein multiple (structural based) alignments  
826 from the PROMALS3D server<sup>74</sup> and by using the in UCSF Chimera implemented AL2CO  
827 algorithm<sup>75</sup>. The MEME suite web server was used for amino acid sequence motif discovery and  
828 evaluation<sup>76</sup>. Protein structures were compared using the Dali server  
829 (<http://ekhidna2.biocenter.helsinki.fi/dali/>) (PMID: 27131377) and the molecular interface between  
830 *ErLnb136<sub>I</sub>* and *ErLnb136<sub>II</sub>* was analyzed (solvent inaccessible interface, Gibbs energy) via the  
831 PDBePISA server (<https://www.ebi.ac.uk/pdbe/pisa/>).

832 The abundance and distribution of HMO utilization genes encoding GH112, GH136<sub>I</sub> and GH136<sub>II</sub>  
833 in *Roseburia* were analyzed by a BLAST search of the corresponding DNA reference sequences  
834 from *R. intestinalis* L1-82, *R. hominis* A2-183 and *R. inulinivorans* A2-194 against a total of 4599  
835 reconstructed *Roseburia* genomes, binned into 42 Species-level Genome Bins (SGBs) by Pasolli  
836 et al.<sup>31</sup>. The variability of the *Roseburia* core xylanase (GH10) was determined similarly by blasting  
837 the DNA reference sequences from *R. intestinalis* L1-82 (ROSINTL182\_06494) against the same  
838 dataset.

839 For further analyses, initial blast hits were filtered based on a 70% identity with any of the 5  
840 conserved *Roseburia* reference genomes. Additionally, *Roseburia* genomes were considered  
841 only if they have a hit with GH112 gene. The resulting 1397 genomes were assigned into the  
842 respective *Roseburia* SGBs, base on they assignation of Pasolli et al.<sup>31</sup>. The retrieved genomes  
843 were used to analyze the gene landscape around the GH112 gene. The RAST server<sup>77</sup> was used  
844 for gene annotation. Based on the annotation and coordinates of the genes, 10 genes upstream  
845 and downstream the GH112 were selected for gene landscapes analysis.

### 846 Quantification and Statistical Analysis:

847 Statistical significant differences were determined using unpaired two-tailed Student's *t*-test.  
848 Statistical parameters, including values of *n* and *p*-values, are reported or indicated in the figures,  
849 figure legends and the result section. The data are expressed as arithmetic means with standard  
850 deviations (SD), unless otherwise indicated.

### 851 Data and Code availability:

852 The mass spectrometry proteomics data have been deposited to the ProteomeXchange  
853 Consortium via the PRIDE partner repository with the dataset identifier PXD015045. The  
854 accession numbers for the atomic coordinates reported in this paper are PDB: 6KQS (Se-Met)  
855 and 6KQT (native), see also Table S6. Mucin glycomis MS/MS data are summarized in Table  
856 S9 and raw data files are available upon request.

857

858 Material and Resource availability:

859 Requests for resources and material should be addressed to Maher Abou Hachem

860 ([maha@bio.dtu.dk](mailto:maha@bio.dtu.dk))

861

862

863

864

## 865 **References**

- 866 1. Clemente, J. C., Ursell, L. K., Parfrey, L. W. & Knight, R. The impact of the gut microbiota  
867 on human health: An integrative view. *Cell* **148**, 1258–1270 (2012).
- 868 2. Sonnenburg, J. L. & Bäckhed, F. Diet-microbiota interactions as moderators of human  
869 metabolism. *Nature* **535**, 56–64 (2016).
- 870 3. Belkaid, Y. & Hand, T. W. Role of the microbiota in immunity and inflammation. *Cell* **157**,  
871 121–41 (2014).
- 872 4. Bokulich, N. A. *et al.* Antibiotics, birth mode, and diet shape microbiome maturation  
873 during early life. *Sci. Transl. Med.* **8**, 343ra82 (2016).
- 874 5. Yassour, M. *et al.* Strain-Level Analysis of Mother-to-Child Bacterial Transmission during  
875 the First Few Months of Life. *Cell Host Microbe* **24**, 146-154.e4 (2018).
- 876 6. Bäckhed, F. *et al.* Dynamics and stabilization of the human gut microbiome during the  
877 first year of life. *Cell Host Microbe* **17**, 690–703 (2015).
- 878 7. Stewart, C. J. *et al.* Temporal development of the gut microbiome in early childhood from  
879 the TEDDY study. *Nature* **562**, 583–588 (2018).
- 880 8. Yatsunencko, T. *et al.* Human gut microbiome viewed across age and geography. *Nature*  
881 **486**, 222–227 (2012).
- 882 9. Robertson, R. C., Manges, A. R., Finlay, B. B. & Prendergast, A. J. The Human  
883 Microbiome and Child Growth – First 1000 Days and Beyond. *Trends in Microbiology* **27**,  
884 131–147 (2019).
- 885 10. Cox, L. M. *et al.* Altering the intestinal microbiota during a critical developmental window  
886 has lasting metabolic consequences. *Cell* **158**, 705–721 (2014).
- 887 11. Cox, L. M. & Blaser, M. J. Antibiotics in early life and obesity. *Nature Reviews*  
888 *Endocrinology* **11**, 182–190 (2015).
- 889 12. Tamburini, S., Shen, N., Wu, H. C. & Clemente, J. C. The microbiome in early life:  
890 implications for health outcomes. *Nat. Med.* **22**, 713–22 (2016).
- 891 13. Marchesi, J. R. *et al.* The gut microbiota and host health: a new clinical frontier. *Gut* **65**,  
892 330–9 (2016).
- 893 14. Vogt, N. M. *et al.* Gut microbiome alterations in Alzheimer’s disease. *Sci. Rep.* **7**, 13537  
894 (2017).
- 895 15. Koropatkin, N. M., Cameron, E. A. & Martens, E. C. How glycan metabolism shapes the  
896 human gut microbiota. *Nat. Rev. Microbiol.* **10**, 323–35 (2012).
- 897 16. Gotoh, A., Ojima, M. N. & Katayama, T. Minority species influences microbiota formation:  
898 the role of Bifidobacterium with extracellular glycosidases in bifidus flora formation in  
899 breastfed infant guts. *Microb. Biotechnol.* **12**, 259–264 (2019).
- 900 17. Sakanaka, M. *et al.* Evolutionary adaptation in fucosyllactose uptake systems supports  
901 bifidobacteria-infant symbiosis. *Sci. Adv.* **5**, eaaw7696 (2019).
- 902 18. Norin, E., Midtvedt, T. & Björkstén, B. Development of faecal short-chain fatty acid

- 903 pattern during the first year of life in Estonian and Swedish infants. *Microb. Ecol. Health*  
904 *Dis.* **16**, 8–12 (2004).
- 905 19. Furusawa, Y. *et al.* Commensal microbe-derived butyrate induces the differentiation of  
906 colonic regulatory T cells. *Nature* **504**, 446–450 (2013).
- 907 20. Bultman, S. J. Bacterial butyrate prevents atherosclerosis. *Nat. Microbiol.* **3**, 1332–1333  
908 (2018).
- 909 21. Canani, R. B. *et al.* Potential beneficial effects of butyrate in intestinal and extraintestinal  
910 diseases. *World J. Gastroenterol.* **17**, 1519–28 (2011).
- 911 22. Arumugam, M. *et al.* Enterotypes of the human gut microbiome. *Nature* **473**, 174–180  
912 (2011).
- 913 23. Louis, P. & Flint, H. J. Diversity, metabolism and microbial ecology of butyrate-producing  
914 bacteria from the human large intestine. *FEMS Microbiol. Lett.* **294**, 1–8 (2009).
- 915 24. Karlsson, F. H. *et al.* Symptomatic atherosclerosis is associated with an altered gut  
916 metagenome. *Nat. Commun.* **3**, 1245 (2012).
- 917 25. Le Chatelier, E. *et al.* Richness of human gut microbiome correlates with metabolic  
918 markers. *Nature* **500**, 541–546 (2013).
- 919 26. Wang, J. *et al.* A metagenome-wide association study of gut microbiota in type 2  
920 diabetes. *Nature* **490**, 55–60 (2012).
- 921 27. Vital, M., Karch, A. & Pieper, D. H. Colonic Butyrate-Producing Communities in Humans:  
922 an Overview Using Omics Data. *mSystems* **2**, (2017).
- 923 28. Yamada, C. *et al.* Molecular Insight into Evolution of Symbiosis between Breast-Fed  
924 Infants and a Member of the Human Gut Microbiome *Bifidobacterium longum*. *Cell Chem.*  
925 *Biol.* **24**, 515-524.e5 (2017).
- 926 29. Sakurama, H. *et al.* Lacto-N-biosidase encoded by a novel gene of *Bifidobacterium*  
927 *longum* subspecies *longum* shows unique substrate specificity and requires a designated  
928 chaperone for its active expression. *J. Biol. Chem.* **288**, 25194–206 (2013).
- 929 30. Derrien, M., Vaughan, E. E., Plugge, C. M. & de Vos, W. M. *Akkermansia muciniphila*  
930 gen. nov., sp. nov., a human intestinal mucin-degrading bacterium. *Int. J. Syst. Evol.*  
931 *Microbiol.* **54**, 1469–1476 (2004).
- 932 31. Pasolli, E. *et al.* Extensive Unexplored Human Microbiome Diversity Revealed by Over  
933 150,000 Genomes from Metagenomes Spanning Age, Geography, and Lifestyle. *Cell*  
934 **176**, 649-662.e20 (2019).
- 935 32. Leth, M. L. *et al.* Differential bacterial capture and transport preferences facilitate co-  
936 growth on dietary xylan in the human gut. *Nat. Microbiol.* **3**, 570–580 (2018).
- 937 33. Wang, T. *et al.* Structural segregation of gut microbiota between colorectal cancer  
938 patients and healthy volunteers. *ISME J.* **6**, 320–329 (2012).
- 939 34. Theilmann, M. C., Fredslund, F., Svensson, B., Lo Leggio, L. & Abou Hachem, M.  
940 Substrate preference of an ABC importer corresponds to selective growth on  $\beta$ -(1,6)-  
941 galactosides in *Bifidobacterium animalis* subsp. *lactis*. *J. Biol. Chem.* jbc.RA119.008843  
942 (2019). doi:10.1074/jbc.ra119.008843

- 943 35. Ejby, M. *et al.* Two binding proteins of the ABC transporter that confers growth of  
944 *Bifidobacterium animalis* subsp. *lactis* ATCC27673 on  $\beta$ -mannan possess distinct manno-  
945 oligosaccharide-binding profiles. *Mol. Microbiol.* **112**, 114–130 (2019).
- 946 36. Kostic, A. D. *et al.* The dynamics of the human infant gut microbiome in development and  
947 in progression toward type 1 diabetes. *Cell Host Microbe* **17**, 260–273 (2015).
- 948 37. Jost, T., Lacroix, C., Braegger, C. & Chassard, C. Assessment of bacterial diversity in  
949 breast milk using culture-dependent and culture-independent approaches. *Br. J. Nutr.*  
950 **110**, 1253–1262 (2013).
- 951 38. Collado, M. C., Delgado, S., Maldonado, A. & Rodríguez, J. M. Assessment of the  
952 bacterial diversity of breast milk of healthy women by quantitative real-time PCR. *Letf.*  
953 *Appl. Microbiol.* **48**, 523–528 (2009).
- 954 39. Jost, T., Lacroix, C., Braegger, C. P., Rochat, F. & Chassard, C. Vertical mother-neonate  
955 transfer of maternal gut bacteria via breastfeeding. *Environ. Microbiol.* **16**, 2891–2904  
956 (2014).
- 957 40. Duncan, S. H., Hold, G. L., Barcenilla, A., Stewart, C. S. & Flint, H. J. Roseburia  
958 intestinalis sp. nov., a novel saccharolytic, butyrate-producing bacterium from human  
959 faeces. *Int. J. Syst. Evol. Microbiol.* **52**, 1615–1620 (2002).
- 960 41. La Rosa, S. L. *et al.* The human gut Firmicute *Roseburia intestinalis* is a primary  
961 degrader of dietary  $\beta$ -mannans. *Nat. Commun.* **10**, 905 (2019).
- 962 42. Scott, K. P., Martin, J. C., Duncan, S. H. & Flint, H. J. Prebiotic stimulation of human  
963 colonic butyrate-producing bacteria and bifidobacteria, *in vitro*. *FEMS Microbiol. Ecol.* **87**,  
964 30–40 (2014).
- 965 43. Rossez, Y. *et al.* Almost all human gastric mucin O-glycans harbor blood group A, B or H  
966 antigens and are potential binding sites for *Helicobacter pylori*. *Glycobiology* **22**, 1193–  
967 1206 (2012).
- 968 44. Holgersson, J., Jovall, P. Å. & Breimer, M. E. Glycosphingolipids of human large  
969 intestine: Detailed structural characterization with special reference to blood group  
970 compounds and bacterial receptor structures. *J. Biochem.* **110**, 120–131 (1991).
- 971 45. Anand, S., Kaur, H. & Mande, S. S. Comparative in silico analysis of butyrate production  
972 pathways in gut commensals and pathogens. *Front. Microbiol.* **7**, 1945 (2016).
- 973 46. Van Den Abbeele, P. *et al.* Butyrate-producing Clostridium cluster XIVa species  
974 specifically colonize mucins in an in vitro gut model. *ISME J.* **7**, 949–961 (2013).
- 975 47. Ward, R. E. Isolation of Milk Oligosaccharides using Solid-Phase Extraction. *Methodology*  
976 **2**, 9–15 (2009).
- 977 48. Robinson, R. C., Colet, E., Tian, T., Poulsen, N. A. & Barile, D. An improved method for  
978 the purification of milk oligosaccharides by graphitised carbon-solid phase extraction. *Int.*  
979 *dairy J.* **80**, 62–68 (2018).
- 980 49. Miller, R. S. & Hoskins, L. C. Mucin degradation in human colon ecosystems: Fecal  
981 population densities of mucin-degrading bacteria estimated by a “most probable number”  
982 method. *Gastroenterology* **81**, 759–765 (1981).
- 983 50. Skoog, E. C. *et al.* Human gastric mucins differently regulate *Helicobacter pylori*

- 984 proliferation, gene expression and interactions with host cells. *PLoS One* **7**, e36378  
985 (2012).
- 986 51. Dümmler, A., Lawrence, A.-M. & de Marco, A. Simplified screening for the detection of  
987 soluble fusion constructs expressed in *E. coli* using a modular set of vectors. *Microb. Cell*  
988 *Fact.* **4**, 34 (2005).
- 989 52. Kulak, N. A., Pichler, G., Paron, I., Nagaraj, N. & Mann, M. Minimal, encapsulated  
990 proteomic-sample processing applied to copy-number estimation in eukaryotic cells. *Nat.*  
991 *Methods* **11**, 319–324 (2014).
- 992 53. Ejby, M. *et al.* An atp binding cassette transporter mediates the uptake of  $\alpha$ -(1,6)-linked  
993 dietary oligosaccharides in bifidobacterium and correlates with competitive growth on  
994 these substrates. *J. Biol. Chem.* **291**, 20220–20231 (2016).
- 995 54. Rappsilber, J., Mann, M. & Ishihama, Y. Protocol for micro-purification, enrichment, pre-  
996 fractionation and storage of peptides for proteomics using StageTips. *Nat. Protoc.* **2**,  
997 1896–1906 (2007).
- 998 55. Gurdeep Singh, R. *et al.* Unipept 4.0: Functional Analysis of Metaproteome Data. *J.*  
999 *Proteome Res.* **18**, 606–615 (2019).
- 1000 56. Anderson, K., Li, S.-C. & Li, Y.-T. Diphenylamine–Aniline–Phosphoric Acid Reagent, a  
1001 Versatile Spray Reagent for Revealing Glycoconjugates on Thin-Layer Chromatography  
1002 Plates. *Anal. Biochem.* **287**, 337–339 (2000).
- 1003 57. Sugiyama, Y. *et al.* Introduction of H-antigens into oligosaccharides and sugar chains of  
1004 glycoproteins using highly efficient 1,2- $\alpha$ -L-fucosynthase. *Glycobiology* **26**, 1235–1247  
1005 (2016).
- 1006 58. Anumula, K. R. & Taylor, P. B. A comprehensive procedure for preparation of partially  
1007 methylated alditol acetates from glycoprotein carbohydrates. *Anal. Biochem.* **203**, 101–  
1008 108 (1992).
- 1009 59. Karlsson, N. G., Schulz, B. L. & Packer, N. H. Structural determination of neutral O-linked  
1010 oligosaccharide alditols by negative ion LC-electrospray-MSn. *J. Am. Soc. Mass*  
1011 *Spectrom.* **15**, 659–672 (2004).
- 1012 60. Ångström, J. *et al.* Novel carbohydrate binding site recognizing blood group A and B  
1013 determinants in a hybrid of cholera toxin and *Escherichia coli* heat-labile enterotoxin B-  
1014 subunits. *J. Biol. Chem.* **275**, 3231–3238 (2000).
- 1015 61. Otwinowski, Z. & Minor, W. Processing of X-ray diffraction data collected in oscillation  
1016 mode. *Methods Enzymol.* **276**, 307–326 (1997).
- 1017 62. Kabsch, W. XDS. *Acta Crystallogr. Sect. D Biol. Crystallogr.* **66**, 125–132 (2010).
- 1018 63. Adams, P. D. *et al.* PHENIX: Building new software for automated crystallographic  
1019 structure determination. *Acta Crystallogr. Sect. D Biol. Crystallogr.* **58**, 1948–1954  
1020 (International Union of Crystallography, 2002).
- 1021 64. Emsley, P., Lohkamp, B., Scott, W. G. & Cowtan, K. Features and development of Coot.  
1022 *Acta Crystallogr. Sect. D Biol. Crystallogr.* **66**, 486–501 (2010).
- 1023 65. Murshudov, G. N., Vagin, A. A. & Dodson, E. J. Refinement of macromolecular structures  
1024 by the maximum-likelihood method. *Acta Crystallographica Section D: Biological*

- 1025            *Crystallography* **53**, 240–255 (1997).
- 1026    66.    Nielsen, H. Predicting secretory proteins with signalP. in *Methods in Molecular Biology*  
1027            **1611**, 59–73 (Humana Press, New York, NY, 2017).
- 1028    67.    Yu, N. Y. *et al.* PSORTb 3.0: improved protein subcellular localization prediction with  
1029            refined localization subcategories and predictive capabilities for all prokaryotes.  
1030            *Bioinformatics* **26**, 1608–1615 (2010).
- 1031    68.    Krogh, A., Larsson, B., Von Heijne, G. & Sonnhammer, E. L. . Predicting transmembrane  
1032            protein topology with a hidden Markov model: Application to complete genomes. *J. Mol.*  
1033            *Biol.* **305**, 567–580 (2001).
- 1034    69.    Mitchell, A. L. *et al.* InterPro in 2019: Improving coverage, classification and access to  
1035            protein sequence annotations. *Nucleic Acids Res.* **47**, D351–D360 (2019).
- 1036    70.    Zhang, H. *et al.* DbCAN2: A meta server for automated carbohydrate-active enzyme  
1037            annotation. *Nucleic Acids Res.* **46**, W95–W101 (2018).
- 1038    71.    Huang, Y., Niu, B., Gao, Y., Fu, L. & Li, W. CD-HIT Suite: A web server for clustering and  
1039            comparing biological sequences. *Bioinformatics* **26**, 680–682 (2010).
- 1040    72.    Katoh, K., Rozewicki, J. & Yamada, K. D. MAFFT online service: multiple sequence  
1041            alignment, interactive sequence choice and visualization. *Brief. Bioinform.* (2017).  
1042            doi:10.1093/bib/bbx108
- 1043    73.    Huson, D. H. *et al.* Dendroscope: An interactive viewer for large phylogenetic trees. *BMC*  
1044            *Bioinformatics* **8**, 460 (2007).
- 1045    74.    Pei, J., Kim, B. H. & Grishin, N. V. PROMALS3D: A tool for multiple protein sequence and  
1046            structure alignments. *Nucleic Acids Res.* **36**, 2295–2300 (2008).
- 1047    75.    Pei, J. & Grishin, N. V. AL2CO: Calculation of positional conservation in a protein  
1048            sequence alignment. *Bioinformatics* **17**, 700–712 (2001).
- 1049    76.    Bailey, T. *et al.* MEME SUITE: tools for motif discovery and searching. *Nucleic Acids Res*  
1050            **37**, (2009).
- 1051    77.    Aziz, R. K. *et al.* The RAST Server: rapid annotations using subsystems technology. *BMC*  
1052            *Genomics* **9**, 75 (2008).
- 1053
- 1054



1055 **Acknowledgement:**

1056 We thank Drs Ayaka Harada and Miki Senda, and the staff of the Photon Factory and Swiss Light  
1057 Source (grant numbers: 20181219 & 20181299) for the X-ray data collection. LC-MS/MS analysis  
1058 of glycans was performed by the Swedish infrastructure for biological mass spectrometry (BioMS)  
1059 supported by the Swedish Research Council. We also wish to thank Tina Johansen for the  
1060 technical help in performing the HPLC measurements for the quantification of butyrate. Dr.  
1061 Takatoshi Arakawa is thanked for managing the X-crystallography structural data. Drs. Fumihiko  
1062 Sato and Kentro Ifuku are thanked for the technical support of MALDI-TOF/MS analysis. We also  
1063 thank Prof. Tine Rask Licht for the use of the microplate reader for some of the growth  
1064 experiments.

1065

1066 **Funding:**

1067 This study is funded by a PhD stipend for MJP from the Technical University of Denmark, Kgs.  
1068 Lyngby, Denmark. Additional funding was obtained by the Iraqi Ministry of Eductions. Carlsberg  
1069 Foundation is acknowledged for an ITC instrument grant (2011-01-0598) and DSC  
1070 instrument grant (2013-01-0112).

1071
