# Supplementary material for: Butyrate producing Clostridiales utilize distinct human milk oligosaccharides correlating to early colonization and prevalence in the human gut
Source: bioRxiv or medRxiv preprint supplement (doi:10.1101/2020.04.15.038927), 2020-04-15
Supplement: Supplementary file [file media-1.pdf]

## Supplementary Information:

### Supplementary Tables:

**Supplementary Table 1: Human milk and blood antigen derived oligosaccharides studied in this work**

| Compound <sup>a</sup>               | Abbreviation             | Supplier                          | Structure <sup>b</sup>                                                                |
|-------------------------------------|--------------------------|-----------------------------------|---------------------------------------------------------------------------------------|
| Lactose                             | Lac                      | Sigma Aldrich                     |    |
| 2-Fucosyllactose                    | 2'FL                     | IsoSep                            |    |
| 3-Fucosyllactose                    | 3'FL                     | IsoSep                            |    |
| Difucosyllactose                    | DFL                      | Dextra Laboratories               |    |
| Lacto- <i>N</i> -biose              | LNB                      | Elicityl                          |    |
| Galacto- <i>N</i> -biose            | GNB                      | Sigma Aldrich                     |    |
| Lacto- <i>N</i> -tetraose           | LNT                      | Elicityl<br>IsoSep                |    |
| Lacto- <i>N</i> -neotetraose        | LNTnT                    | Dextra Laboratories               |   |
| Lacto- <i>N</i> -fucopentaose I     | LNFP I                   | Dextra Laboratories               |  |
| Lacto- <i>N</i> -fucopentaose II    | LNFP III                 | Hneywell Fluka                    |  |
| Lacto- <i>N</i> -fucopentaose III   | LNFP III                 | Carbosynth                        |  |
| Lacto- <i>N</i> -difucohexaose I    | LNDFH I                  | Dextra Laboratories<br>Carbosynth |  |
| Lacto- <i>N</i> -difucohexaose II   | LNDFH II                 | Elicityl<br>Dextra Laboratories   |  |
| Blood group antigen H triose type 1 | H triose type 1          | Elicityl                          |  |
| Blood group antigen A triose        | A triose                 | Elicityl                          |  |
| Lewis A antigen triose              | Le <sup>a</sup> triose   | Elicityl                          |  |
| Lewis B antigen tetraose            | Le <sup>b</sup> tetraose | Carbosynth                        |  |

<sup>a</sup>All carbohydrates were > 95% pure unless otherwise stated.

<sup>b</sup>Glycan structures presentation according to Symbol Nomenclature for Glycans (SNFG) (<https://www.ncbi.nlm.nih.gov/glycans/snfg.html>)

**Supplementary Table 2: Binding and thermodynamic parameters of *Rh*LNBBP determined by ITC.**

| Ligand  | $K_D$ ( $\mu\text{M}$ ) | $N_0$       | $\Delta H$                | $-T\Delta S$              | $\Delta G$                |
|---------|-------------------------|-------------|---------------------------|---------------------------|---------------------------|
|         |                         |             | (kcal mol <sup>-1</sup> ) | (kcal mol <sup>-1</sup> ) | (kcal mol <sup>-1</sup> ) |
| LNB     | 2.86 ± 0.26             | 0.85 ± 0.02 | -29.25 ± 0.86             | 21.69                     | -7.65                     |
| GNB     | 11.04 ± 0.06            | 1.25 ± 0.03 | -12.93 ± 0.42             | 6.17                      | -6.75                     |
| LNT     | 10.30 ± 0.60            | 0.88 ± 0.01 | -19.36 ± 0.23             | 12.55                     | -6.85                     |
| Lactose | n.b.                    |             |                           |                           |                           |
| 2'FL    | n.b.                    |             |                           |                           |                           |

Data are from duplicates and binding parameters are means of duplicates with standard deviation. n.b.: affinity too low to be determined.  $N_0$  is the molar binding stoichiometry.

**Supplementary Table 3: Binding parameters of *R/Le<sup>a/b</sup>*BP determined by SPR**

| Ligand                       | $K_D$ ( $\mu\text{M}$ ) | $R_{\text{max}}$ | $\chi^2$ |
|------------------------------|-------------------------|------------------|----------|
| LNB                          | 6.7 ± 0.7               | 10.4             | 0.10     |
| GNB                          | 11 ± 0.9                | 10.4             | 0.06     |
| Le <sup>b</sup> tetraose     | 1.8 ± 0.1               | 25.1             | 0.54     |
| Le <sup>a</sup> triose       | 3.2 ± 0.5               | 17.3             | 0.32     |
| H triose type 1              | 11.3 ± 2.5              | 8.8              | 0.06     |
| LNT                          | n.b.                    |                  |          |
| Blood group A antigen triose | n.b.                    |                  |          |
| 2'FL                         | n.b.                    |                  |          |
| 3'FL                         | n.b.                    |                  |          |
| LNnT                         | n.b.                    |                  |          |
| Lactose                      | n.b.                    |                  |          |

The binding parameters are means of duplicates with standard deviation. n.b. indicates low affinity to ligand precluding determination of binding parameters.  $R_{\text{max}}$  and  $\chi^2$  denote the maximum binding level from the fits to a one binding site model and the statistical goodness of the fit to the same model, respectively.

**Supplementary Table 4. Kinetic parameters of *RhLnb136*, *RiLe<sup>a/b</sup>136* and *ErLnb136***

| Substrate | Enzyme                       | $K_M$<br>(mM) | $k_{cat}$<br>(s <sup>-1</sup> ) | $k_{cat}/K_M$<br>(s <sup>-1</sup> mM <sup>-1</sup> ) | specific activity <sup>a</sup><br>(U mg <sup>-1</sup> ) |
|-----------|------------------------------|---------------|---------------------------------|------------------------------------------------------|---------------------------------------------------------|
| LNT       | <i>RhLnb136</i>              | 1.45 ± 0.05   | 86 ± 1                          | 59.3                                                 | 58.5 ± 0.58                                             |
| LNT       | <i>RiLe<sup>a/b</sup>136</i> | -             | -                               | -                                                    | 0.21 ± 0.00                                             |
| LNT       | <i>ErLnb136</i>              | 0.68 ± 0.07   | 160 ± 7                         | 235.3                                                |                                                         |
| LNT       | <i>ErLnb136</i> Y145A        | n.d.          | n.d.                            | 48                                                   |                                                         |

<sup>a</sup> specific activity determined towards 3.5 mM LNT. n.d.: Lack of curvature of the Michaelis Menten plot preclude determination of kinetic parameters. Data are means of triplicates with standard deviation.

**Supplementary Table 5. Specific activities of *RhGLnbp112* and *RiGLnbp112***

| Substrate | <i>RhGLnbp112</i><br>(U mg <sup>-1</sup> ) | <i>RiGLnbp112</i><br>(U mg <sup>-1</sup> ) |
|-----------|--------------------------------------------|--------------------------------------------|
| LNB       | 12.2 ± 0.5                                 | 22.6 ± 0.2                                 |
| GNB       | 9.6 ± 0.1                                  | 16.9 ± 0.4                                 |

Data are means of triplicates with standard deviation. Specific activities determined towards 2 mM LNB or GNB.

**Supplementary Table 6: Crystallographic data collection and refinement statistics.**

|                                               | <i>ErLnb136 Se-Met</i>                       | <i>ErLnb136 Native</i>                                    |
|-----------------------------------------------|----------------------------------------------|-----------------------------------------------------------|
| <b>PDB ID</b>                                 | 6KQS                                         | 6KQT                                                      |
| <b>Data collection<sup>a</sup></b>            |                                              |                                                           |
| Beamline                                      | SLS X06DA                                    | KEK-PF BL5A                                               |
| Wavelength (Å)                                | 0.978                                        | 1.000                                                     |
| Space group                                   | <i>P</i> 3 <sub>1</sub> 21                   | <i>P</i> 3 <sub>1</sub> 21                                |
| Unit cell (Å)                                 | <i>a</i> = <i>b</i> = 132.7, <i>c</i> = 82.5 | <i>a</i> = <i>b</i> = 132.3, <i>c</i> = 82.2              |
| Resolution (Å)                                | 45.75–1.40 (1.42–1.40)                       | 50.0–2.00 (2.03–2.00)                                     |
| <i>R</i> <sub>merge</sub>                     | 0.145 (1.909)                                | 0.233 (1.065)                                             |
| Number of observations                        | 3,288,573 (155,651)                          | 556,706                                                   |
| Unique reflections                            | 153,888 (8,031)                              | 56,318 (2,757)                                            |
| Mean <i>I</i> / $\sigma$ ( <i>I</i> )         | 12.2 (1.7)                                   | 13.4 (3.0)                                                |
| CC (1/2)                                      | 0.999 (0.728)                                | 0.980 (0.824)                                             |
| Completeness (%)                              | 100.0 (100.0)                                | 100.0 (100.0)                                             |
| Multiplicity                                  | 20.1 (19.4)                                  | 9.9 (9.6)                                                 |
| Anomalous completeness (%)                    | 100.0 (100.0)                                | –                                                         |
| Anomalous multiplicity                        | 10.2 (9.8)                                   | –                                                         |
| <b>Refinement</b>                             |                                              |                                                           |
| Resolution                                    | 47.20–1.40                                   | 47.04–2.00                                                |
| No. of reflections                            | 155,798                                      | 53,440                                                    |
| <i>R</i> factor/ <i>R</i> <sub>free</sub> (%) | 14.8 (17.2)                                  | 14.3 (18.1)                                               |
| No. of atoms                                  | 5,920                                        | 5,787                                                     |
| No. of solvents                               | 835 (water), 1 (glycerol)                    | 706 (water), 1 (triethylene glycol), 1 (Na <sup>+</sup> ) |
| RMSD from ideal values                        |                                              |                                                           |
| Bond lengths (Å)                              | 0.016                                        | 0.011                                                     |
| Bond angles (°)                               | 1.975                                        | 1.63                                                      |
| Ramachandran plot (%)                         |                                              |                                                           |
| Favored                                       | 95.9                                         | 95.8                                                      |
| Allowed                                       | 4.1                                          | 4.2                                                       |
| Outlier                                       | 0                                            | 0                                                         |

<sup>a</sup>Values in parentheses are for the highest resolution shell.



**Supplementary Table 7: Summary of structural similarity Dali server search of ErLnb136.**

| Protein                                                | Source organism                     | PDB (chain) | Z score | RMSD (Å) | N <sub>align</sub> <sup>a</sup> | % <sub>seq</sub> <sup>b</sup> |
|--------------------------------------------------------|-------------------------------------|-------------|---------|----------|---------------------------------|-------------------------------|
| <b>ErLnb136<sub>I</sub> (residues 7-224)</b>           |                                     |             |         |          |                                 |                               |
| SurA-like putative peptidyl-prolyl cis-trans isomerase | <i>Helicobacter pylori</i>          | 5EZ1 (A)    | 7       | 3.2      | 70                              | 19 (6)                        |
| Hypothetical protein LIC12922                          | <i>Leptospira interrogans</i>       | 3NRK (A)    | 5.8     | 4.8      | 105                             | 10 (5)                        |
| <b>ErLnb136<sub>II</sub> (residues 242-663)</b>        |                                     |             |         |          |                                 |                               |
| LnbX (GH136)                                           | <i>Bifidobacterium longum</i>       | 5QQC (H)    | 50.3    | 1.4      | 416                             | 44 (43)                       |
| α-L-fucosidase BT_1002 (GH141)                         | <i>Bacteroides thetaiotaomicron</i> | 5MQP (F)    | 32      | 3.1      | 312                             | 16 (12)                       |

Data were obtained using Dali server.

<sup>a</sup>Number of aligned residues

<sup>b</sup>Sequence identity of aligned residues and the corresponding overall (global) sequence identity showed in parenthesis

**Supplementary Table 8. Primers for cloning and mutagenesis.**

| <b>Locus tag</b>              | <b>Accession<sup>a</sup></b> | <b>Designation</b>                        | <b>Orientation</b> | <b>Sequence (5'-&gt;3')</b>                |
|-------------------------------|------------------------------|-------------------------------------------|--------------------|--------------------------------------------|
| RHOM_04115                    | G2T0V1                       | <i>RhLnb136<sub>II</sub></i>              | Forward            | AGGAGATATACCATGGATGACAGGCTCATACAGGAC       |
| RHOM_04115                    | G2T0V1                       | <i>RhLnb136<sub>II</sub></i>              | Reverse            | GGTGGTGGTGTCTCGAGGCCCAACGGAATAATCGTATTATCC |
| RHOM_04110                    | G2T0V0                       | <i>RhLnb136<sub>I</sub></i>               | Forward            | AGGAGATATACCATGGATGAATCGGAAATATTGTCTGGAT   |
| RHOM_04110                    | G2T0V0                       | <i>RhLnb136<sub>I</sub></i>               | Reverse            | GGTGGTGGTGTCTCGAGGCCCGCCCGTTTTCTGA         |
| RHOM_04120                    | G2T0V2                       | <i>RhGLnbp112</i>                         | Forward            | AGGAGATATACCATGGATGACTTTAAAAGAGGGACGTG     |
| RHOM_04120                    | G2T0V2                       | <i>RhGLnbp112</i>                         | Reverse            | GGTGGTGGTGTCTCGAGGCCAATGTTATACCATTTAATCTCG |
| RHOM_04095 (AA36-454)         | G2T0U7                       | <i>RhLNBBP</i>                            | Forward            | TTTCAGGGCGCCATGGGTGCAGCTGAAACCAGCC         |
| RHOM_04095 (AA36-454)         | G2T0U7                       | <i>RhLNBBP</i>                            | Reverse            | GACGGAGCTCGAATTCTTATTCTACTAATGTTAAATTCAAC  |
| ROSEINA2194_01898 (AA26-861)  | C0FT31                       | <i>RiLe<sup>a/b</sup><sub>II</sub>136</i> | Forward            | TTTCAGGGCGCCATGGGTAAATGCAGGGACAACCT        |
| ROSEINA2194_01898 (AA26-861)  | C0FT31                       | <i>RiLe<sup>a/b</sup><sub>II</sub>136</i> | Reverse            | GACGGAGCTCGAATTCTTATCTTCTGTAAAGCTCAAATTCT  |
| ROSEINA2194_01899 (AA36-340)  | C0FT32                       | <i>RiLe<sup>a/b</sup><sub>I</sub>136</i>  | Forward            | CAGCCATATGCTCGAGGGAGAAAATATTAAGATTTCCAAAG  |
| ROSEINA2194_01899 (AA36-340)  | C0FT32                       | <i>RiLe<sup>a/b</sup><sub>I</sub>136</i>  | Reverse            | CAGCCGGATCCTCGAGCTAATTCCATTTAATCGTATCG     |
| ROSEINA2194_01885             | C0FT18                       | <i>RiGLnbp112</i>                         | Forward            | TTTCAGGGCGCCATGGGTAAATAAGAACACGGTGGAAGAGT  |
| ROSEINA2194_01885             | C0FT18                       | <i>RiGLnbp112</i>                         | Reverse            | GACGGAGCTCGAATTCTTAAACAGCGTACCATTTAATCTCA  |
| ROSEINA2194_01895 (AA23-470)  | C0FT28                       | <i>RiLe<sup>a/b</sup>BP</i>               | Forward            | TTTCAGGGCGCCATGGGAAATGCAAATACATCCGCAAACAC  |
| ROSEINA2194_01895 (AA23-470)  | C0FT28                       | <i>RiLe<sup>a/b</sup>BP</i>               | Reverse            | GACGGAGCTCGAATTCTTATTGCGCAGTTTCTGAAACCTC   |
| ROSEINA2194_01891/01890       | C0FT24/C0FT23                | <i>RiFuc29</i>                            | Forward            | TTTCAGGGCGCCATGGGGAGGACACCCGAAGAACAGA      |
| ROSEINA2194_01891/01890       | C0FT24/C0FT23                | <i>RiFuc29</i>                            | Reverse            | GACGGAGCTCGAATTCTTATGATTCTTGATAAACCTCAA    |
| ROSEINA2194_01889/01888/01887 | C0FT22/C0FT21/C0FT20         | <i>RiFuc95</i>                            | Forward            | TTTCAGGGCGCCATGGGGGATTTAAGTAAATATGATATTTG  |
| ROSEINA2194_01889/01888/01887 | C0FT22/C0FT21/C0FT20         | <i>RiFuc95</i>                            | Reverse            | GACGGAGCTCGAATTCTTATCTGTAAATTTTGCATTTCT    |
| ROSEINA2194_02198 (AA29-975)  | C0FTX7                       | <i>RiGH98</i>                             | Forward            | TTTCAGGGCGCCATGGGCAAACGGGATCAGAAT          |
| ROSEINA2194_02198 (AA29-975)  | C0FTX7                       | <i>RiGH98</i>                             | Reverse            | GACGGAGCTCGAATTCTTAAACTATATCAAAATACACAT    |
| HMPREF0373_02965              | U2PDT9                       | <i>ErLnb136</i>                           | Forward            | TTTCAGGGCGCCATGGGAAAATTGTGTGAAAATCAGCAGG   |
| HMPREF0373_02965              | U2PDT9                       | <i>ErLnb136</i>                           | Reverse            | GACGGAGCTCGAATTCTTAAATCAGATGGATTTCTATTCTCC |
| HMPREF0373_02965              | U2PDT9                       | <i>ErLnb136_Y145A</i>                     | Forward            | CGAAAACAGATCACCATGAGCCCTGGTAAACAGATCCTGG   |
| HMPREF0373_02965              | U2PDT9                       | <i>ErLnb136_Y145A</i>                     | Reverse            | CCAGGATCTGTTTACCAGGGCTCATGGTGATCTGTTTTCTG  |

<sup>a</sup> UniProtKB accession number

## Supplementary Figures:

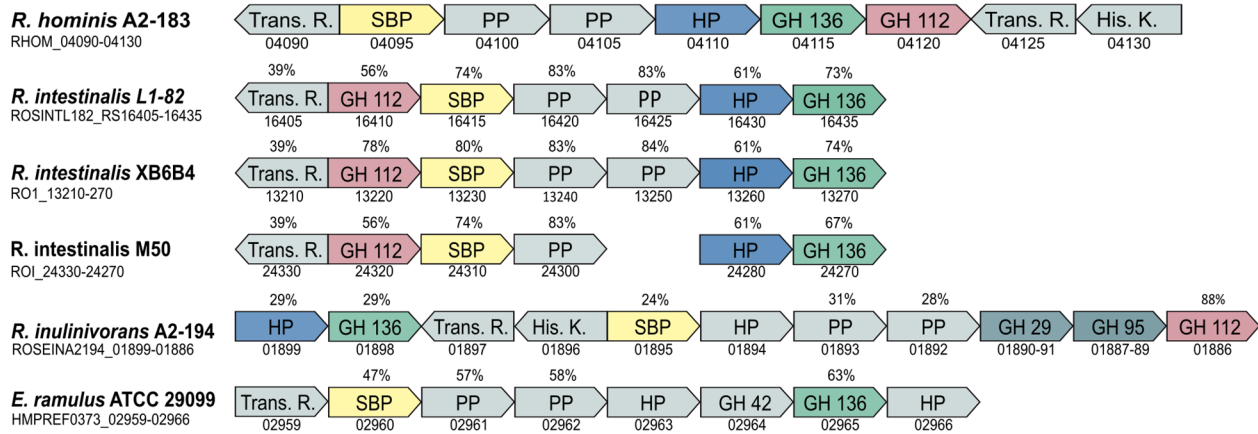

**Supplementary Fig. 1: The conservation of the core HMO utilization loci within *Roseburia* spp. and *Eubacterium ramulus*.** Gene locus IDs are below the genes, which are denoted according to their protein products: transcriptional regulator (Trans. R.); ABC transporter solute binding protein (SBP); ABC transporter permease protein (PP), hypothetical proteins (HP), glycoside hydrolase (GH) and histidine kinase sensory protein (His. K.). Sequence identities to the *R. hominis* A2-183 corresponding homologs are above the genes. Genes coding for GH136 family members were identified via the dbCAN database.



**a** *R. inulinivorans*-L-fucose acid utilization locus

| Locus ID | Log2 fold change |           | Protein | Annotation                                    |
|----------|------------------|-----------|---------|-----------------------------------------------|
|          | HMOs/Glc         | Mucin/Glc |         |                                               |
| 01688    |                  |           |         | Transcriptional regulator                     |
| 01689    | 6.64             | 6.64      | fucI    | L-fucose isomerase                            |
| 01690    |                  |           |         | Hypothetical protein                          |
| 01691    | 2.52             |           | ABC-PP  | ABC transporter, permease protein             |
| 01692    | 3.04             | 6.64      | ABC-PP  | ABC transporter, permease protein             |
| 01693    | 5.18             | 4.72      | ABC-PP  | ABC transporter, permease protein             |
| 01694    |                  |           | ABC-PP  | ABC transporter, permease protein             |
| 01695    | 5.59             | 6.64      | ABC-SBP | ABC, solute binding protein                   |
| 01696    | 1.65             | 2.1       |         | FucU transport protein                        |
| 01697    | 0.37             |           |         | Hypothetical protein                          |
| 01698    |                  |           |         | Carbohydrate kinase                           |
| 01699    | 1.15             | 1.92      | fucK    | L-fuculokinase                                |
| 01700    | 1.87             |           |         | Nucleotide binding domain ParA family protein |
| 01701    | 1.74             | 1.71      |         | Hypothetical protein                          |
| 01702    | 1.46             |           |         | Hypothetical protein                          |
| 01703    | 2.58             | 5.2       |         | BMC domain protein                            |
| 01704    |                  |           |         | Ethanolamine/Propanediol utilization protein  |
| 01705    | 3.82             | 3.64      | fucA    | L-fuculophosphate aldolase                    |
| 01706    | 2.43             |           |         | Hypothetical protein                          |
| 01707    | 3.97             | 3.35      |         | Hypothetical protein                          |
| 01708    | 3.15             | 3.68      |         | CoA dependent aldehyd dehydrogenase           |
| 01709    | 3.83             | 4.12      |         | Alcohol dehydrogenase                         |
| 01710    | 2.77             | 4.24      |         | BMC domain protein                            |
| 01711    | 3.21             | 3.12      |         | BMC domain protein                            |
| 01712    | 2.49             | 3.01      |         | BMC domain protein                            |
| 01713    | 2.73             | 2.67      |         | BMC domain protein                            |
| 01714    | 3.39             | 3.64      |         | Phosphate propanoyltransferase                |
| 01715    | 4.27             |           |         | Ethanolamine/Propanediol utilization protein  |
| 01716    | 3.07             | 2.29      |         | NADH dehydrogenase like subunit protein       |
| 01717    | 2.11             | 2.52      |         | BMC domain protein                            |
| 01718    | 2.65             |           |         | Transcriptional regulator                     |
| 01719    | 3.14             | 2.82      |         | Propanediol dehydratase                       |
| 01720    | 2.64             |           |         | Pyruvate lyase                                |

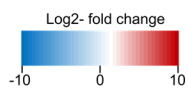

*R. inulinivorans* N-acetylneuraminic acid utilization locus

| Locus ID | Log2 fold change |           | Protein | Annotation                                |
|----------|------------------|-----------|---------|-------------------------------------------|
|          | HMOs/Glc         | Mucin/Glc |         |                                           |
| 00873    |                  |           |         | Transcriptional regulator                 |
| 00874    | 2.11             | 1.32      | nagB    | glucosamine-6-phosphate deaminase         |
| 00875    | 0.28             | 1.65      |         | Transcriptional regulator                 |
| 00876    | 2.96             | 4.71      |         | ABC transporter, solute binding protein   |
| 00877    |                  |           |         | Hypothetical protein                      |
| 00878    |                  |           | ABC-PP  | ABC transporter, permease protein         |
| 00879    |                  |           | ABC-PP  | ABC transporter, permease protein         |
| 00880    | 2.57             | 5.02      | nanA    | N-acetylneuraminase lyase                 |
| 00881    | 1.95             | 3.67      | YhcH    | YhcH family protein                       |
| 00882    | 2.71             | 4.25      | nanE    | N-acetylmannosamine-6-phosphate epimerase |
| 00883    | 2.89             | 4.65      | nanK    | N-acetylmannosamine kinase                |
| 00884    | 1.52             | 3.21      | AE      | Acetylsterase                             |

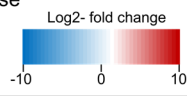

**Supplementary Fig. 3: *R. inulinivorans* upregulated L-fucose and N-acetylneuraminic acid utilization loci. (a)** Upregulation of L-fucose utilization cluster of *R. inulinivorans*. **(b)** Upregulation of putative N-acetylneuraminic acid utilization cluster of *R. inulinivorans* cells grown on purified HMOs from mother milk and mucin, respectively, relative to glucose (Glc). **(a,b)** The heatmaps depict Log2-fold changes of proteins expressed by cells grown on HMOs or mucin, respectively, relative to glucose. Locus numbers Roseina2194\_XXXX are abbreviated with the last numbers after the hyphen.

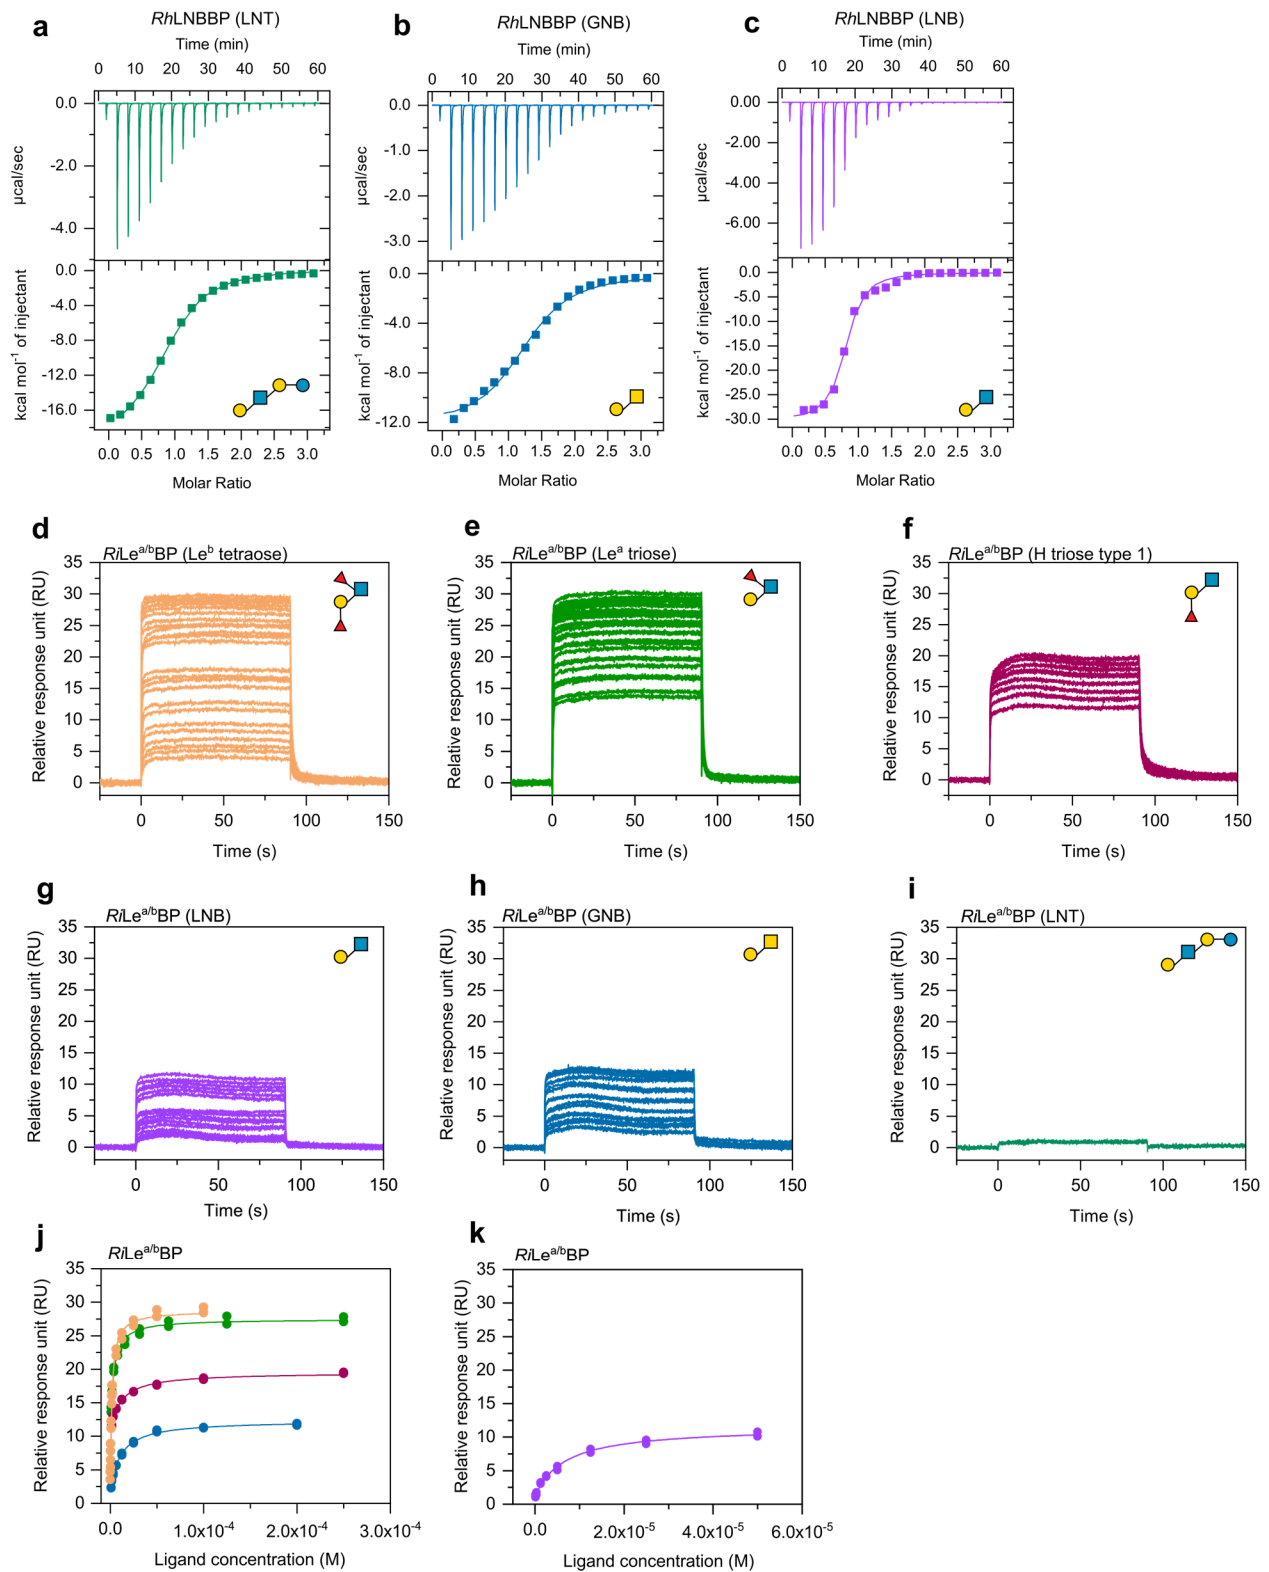

**Supplementary Fig. 4: Binding of *RhLNBBP* and *RiLe*<sup>a/b</sup>BP to HMOs.** (a-c) ITC analysis of *RhLNBBP* to selected HMOs. (d-i) Reference and blank corrected sensograms illustrating binding of selected HMOs to *RiLe*<sup>a/b</sup>BP. (j-k) One binding model fitted to the binding isotherms from the sensograms in (d-i). ITC and SPR experiments were performed as duplicates.

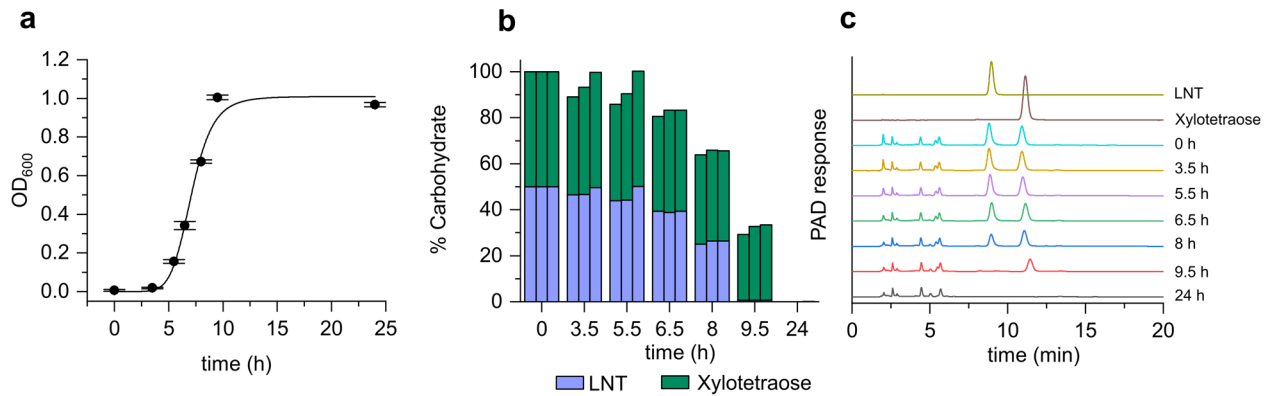

**Supplementary Fig. 5: Oligosaccharide uptake preference of *R. hominis* during growth on an equimolar LNT and xylotetraose mixture.** (a), Growth curve of *R. hominis* on YCFA supplemented with 0.5 % (w/v) of an equal mixture of xylotetraose and LNT. (b), Time course of relative percentages of xylotetraose and LNT in culture supernatants from (a) calculated based on HPAEC-PAD analyses as exemplarily represented in (c). (c), HPAEC-PAD chromatograms showing time course analysis of culture supernatants of *R. hominis* grown on YCFA supplemented with 0.5 % (w/v) of an equal mixture of xylotetraose and LNT. Observed peaks between 0 and 6 minutes are medium components. Growth experiment (a) and HPAEC-PAD analysis (b,c) were performed in triplicates.

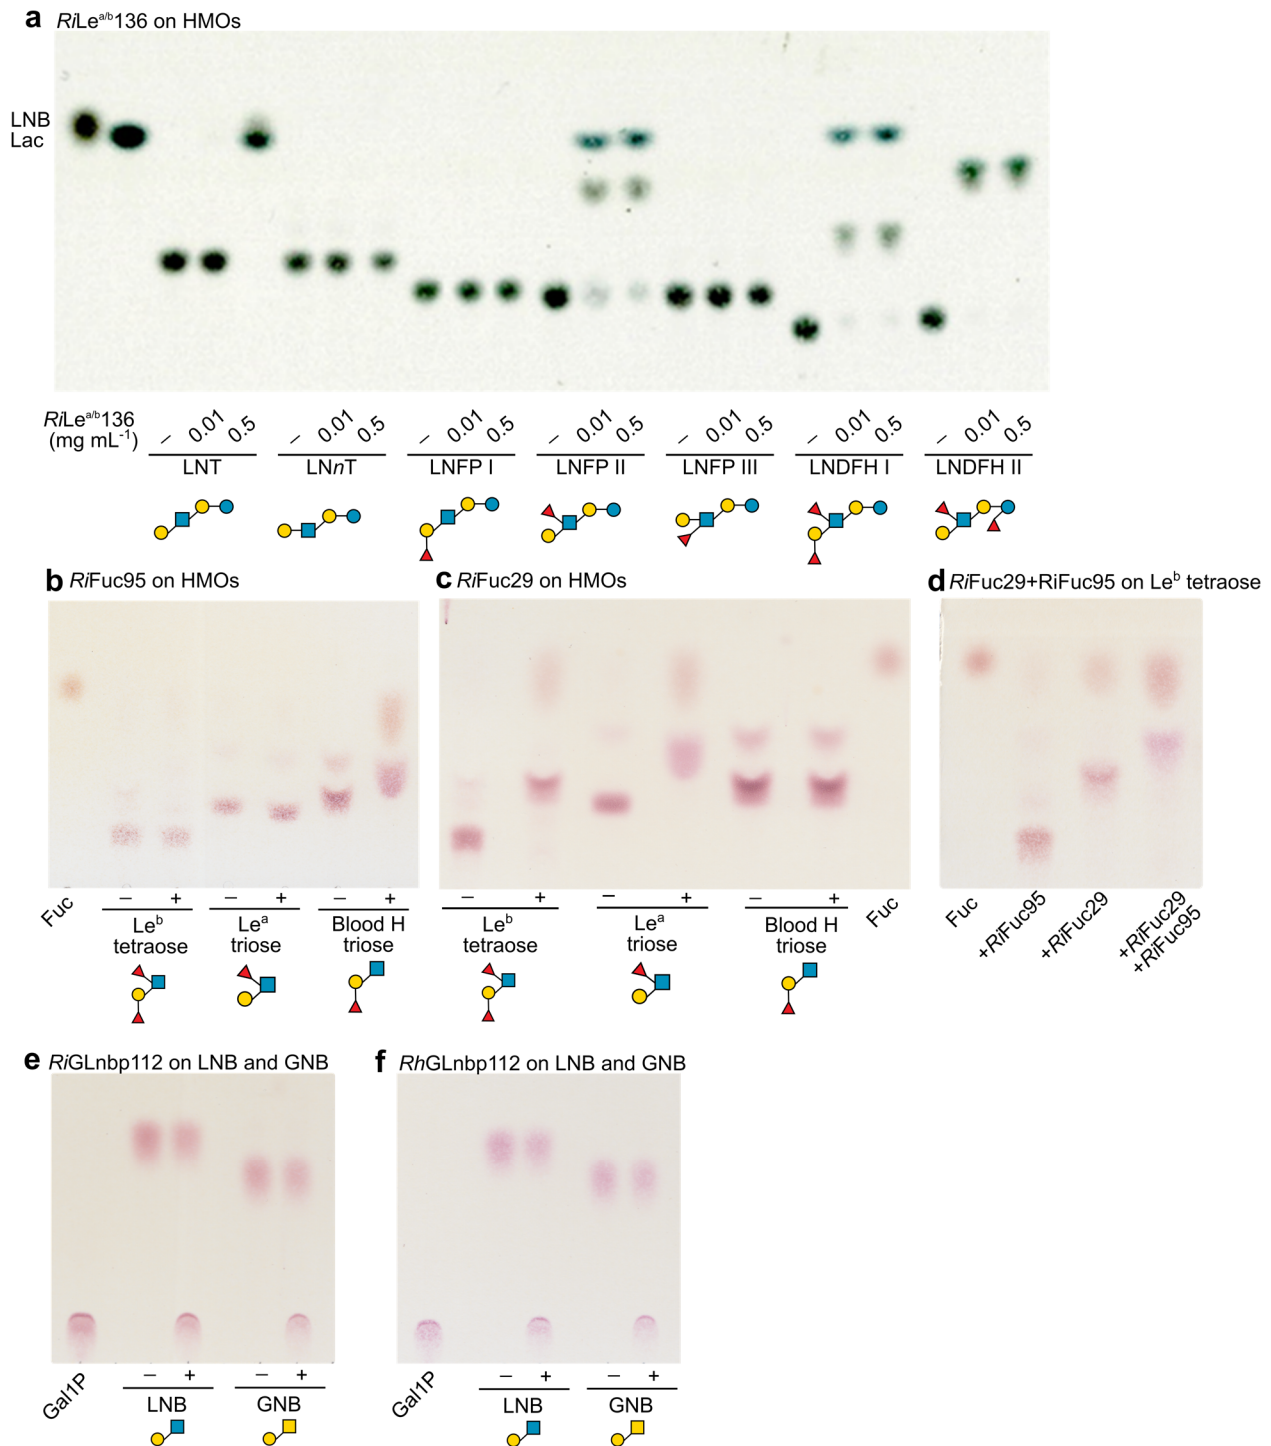

**Supplementary Fig. 6: Substrate preference of *RiLe<sup>a/b</sup>136* and intracellular decomposition of GH136 degradation products in *Roseburia*.** (a), Substrate preference of *RiLe<sup>a/b</sup>136* towards HMOs; reactions with 0.01 or 0.5 mg mL<sup>-1</sup> of *RiLe<sup>a/b</sup>136*, respectively. (b), Fucosidase activity of *RiFuc95* on HMOs. (c), Fucosidase activity of *RiFuc29* on HMOs. (d), Complete defucosylation of Le<sup>b</sup> tetraose by orchestral action of *RiFuc29* and *RiFuc95*. Data show hindrance of *RiFuc95* by  $\alpha$ -(1→2)-linked L-fucose on Le<sup>b</sup> tetraose. (e), Phosphorylase activity of *RiGLnbp112*. (f), Phosphorylase activity of *RhGLnbp112*. (a-f), +: reactions with enzyme, -: controls without enzyme. Analyses were performed in duplicates.



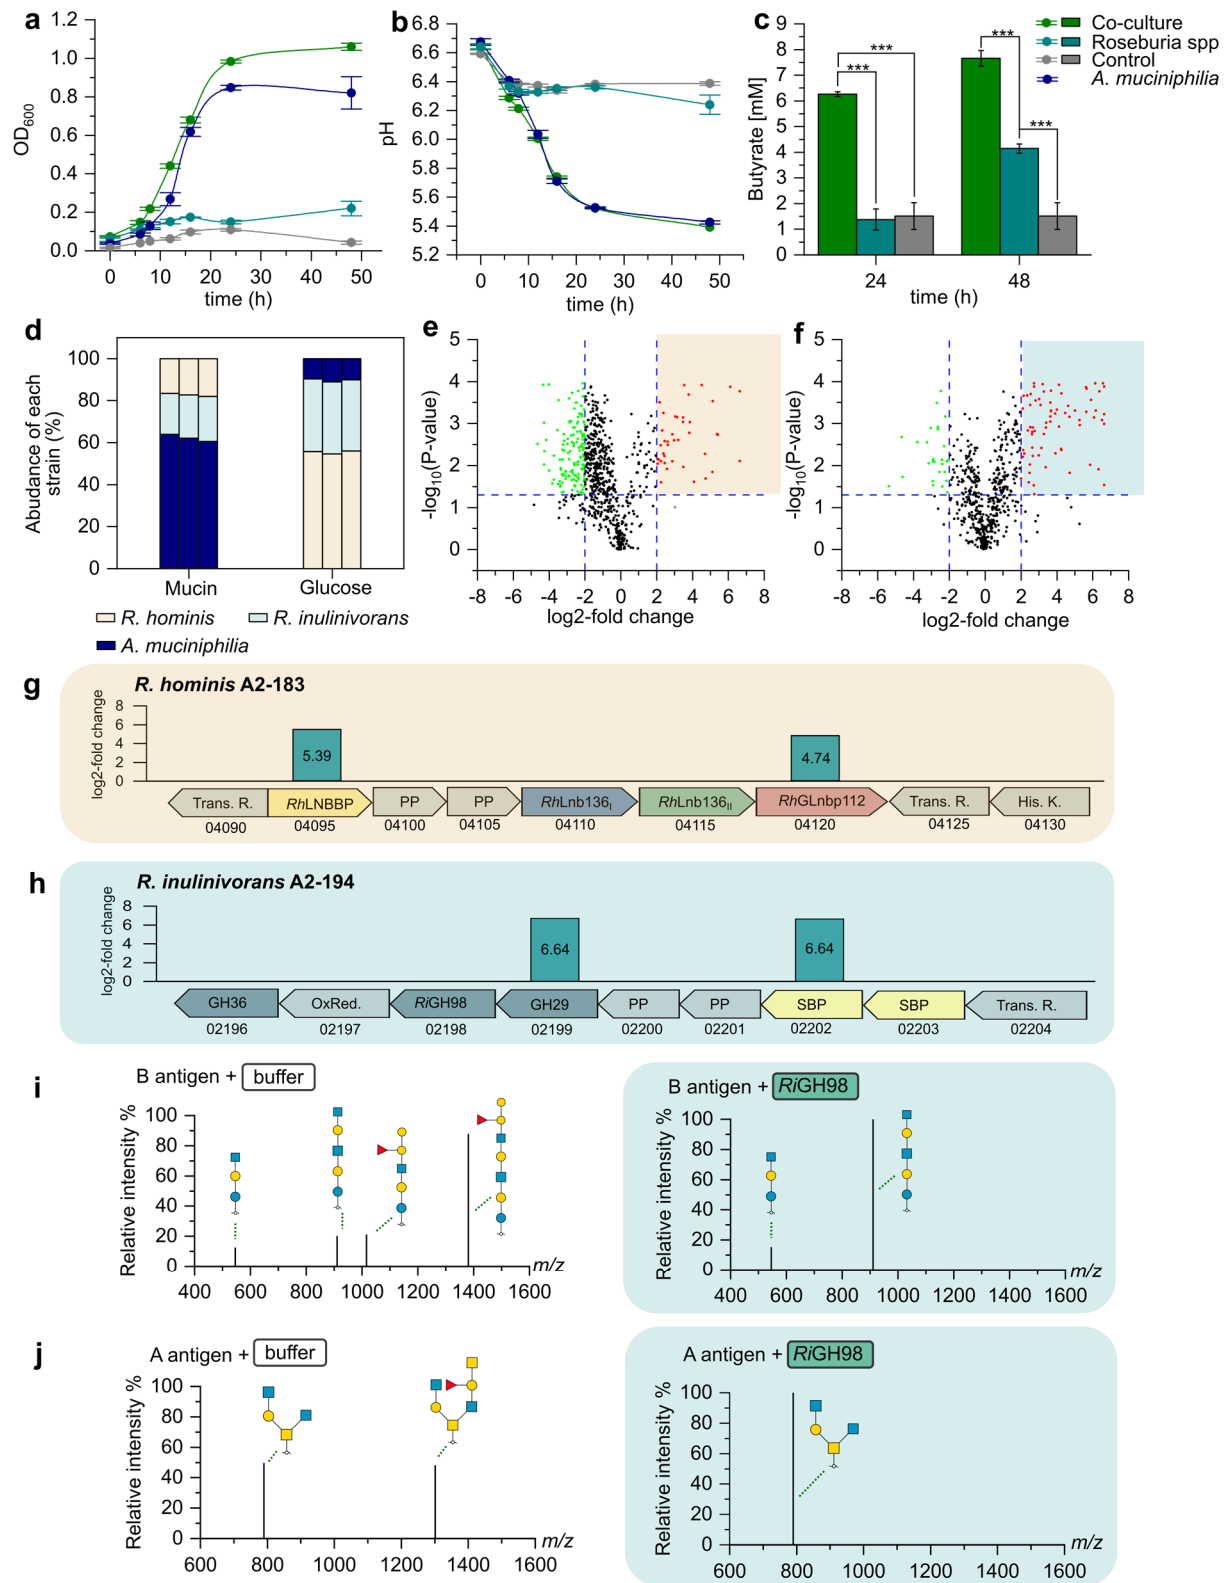

**Supplementary Fig. 7: Crossfeeding of *Roseburia* in *A. muciniphilia* co-cultures on mucin. (a-b)**, Growth of monocultures and co-cultures of *Roseburia* spp. and *A. muciniphilia* on mucin. **(c)**, Butyrate in culture supernatants of monocultures and co-cultures as in (a) at 24h and 48h. **(d)**, Relative strain abundance during growth of co-cultures on mucin and glucose at 16 h determined based on MS/MS analyses. **(e)**, Volcano plot depicting upregulation pattern of proteins in *R. hominis* cells or **(f)**, in *R. inulinivorans* cells grown in mucin co-culture relative to glucose. **(g)**, Upregulated proteins in the core HMOs locus of *R. hominis* cells as in (e). Upregulated proteins in putative blood group utilization locus of *R. inulinivorans* cells as in (f). **(i-j)** Degradation of Blood group antigen A and B by *RiGH98* analyzed by nanoLC-MS. **(a-j)**, Growth cultures were performed in four replicates, proteomics analyses originate from biological triplicates and nanoLC-MS analyses were performed in duplicates. **(c)** Three asterisk (\*\*\*) indicate a statistically significant difference at a level of  $p < 0.001$

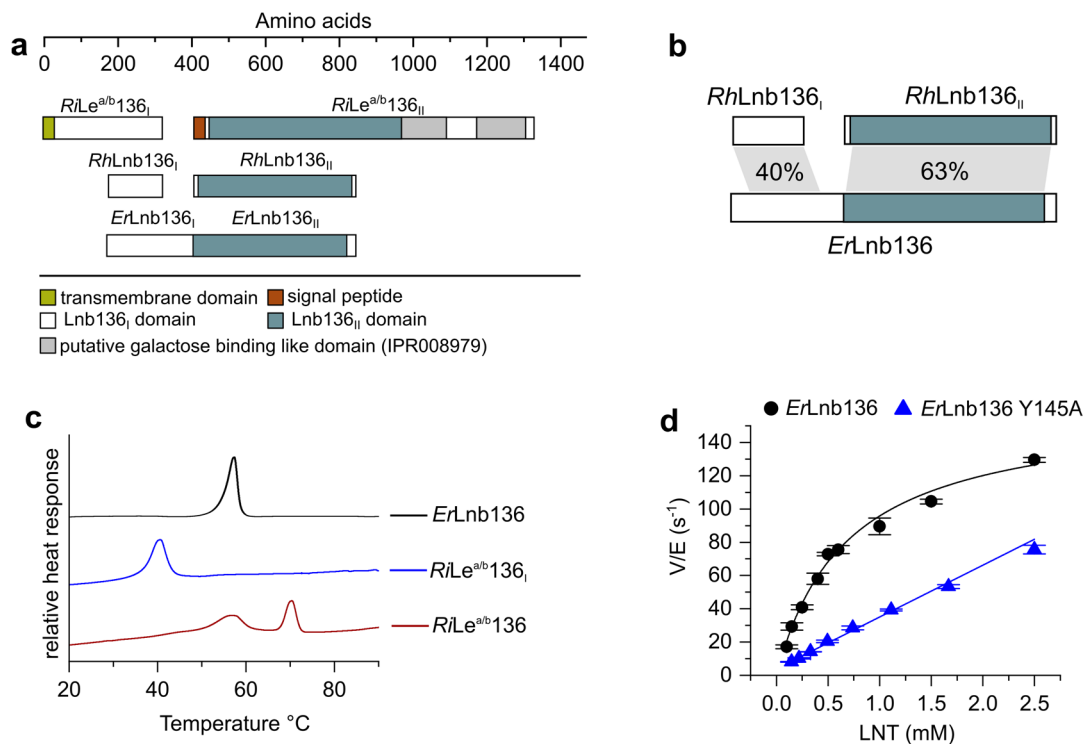

**Supplementary Fig. 8: Organization, stability and functional interactions of GH136 domains.** (a) domain organization of GH136 enzymes in *R. inulinivorans*, *R. hominis* and *E. ramulus*. (b) Amino acid sequence identities between the two GH136 domains *RhLnb136<sub>i</sub>* and *RhLnb136<sub>ii</sub>* from *R. hominis* and *ErLnb136* from *E. ramulus*. (c) Differential scanning calorimetry thermograms showing the unfolding of *ErLnb136* and of *RiLe<sup>ab</sup>136<sub>i</sub>* and *RiLe<sup>ab</sup>136*. The unfolding of the two domains of *ErLnb136* appears to overlap giving rise to a single asymmetric thermal transition consistent with the cooperative unfolding of the domains. By contrast, the unfolding of *RiLe<sup>ab</sup>136* features two well resolved transitions, the first is likely attributed to the unfolding of the *RiLe<sup>ab</sup>136<sub>i</sub>* domain while the second is likely to be attributed to the unfolding of the remaining part of the protein including the *RiLe<sup>ab</sup>136<sub>ii</sub>* domain. (d), Hydrolysis kinetics of *ErLnb136* and the mutant *ErLnb136* Y145A on LNT. DSC analyses (c) were performed as duplicates and kinetic measurements (d) were performed as triplicates.

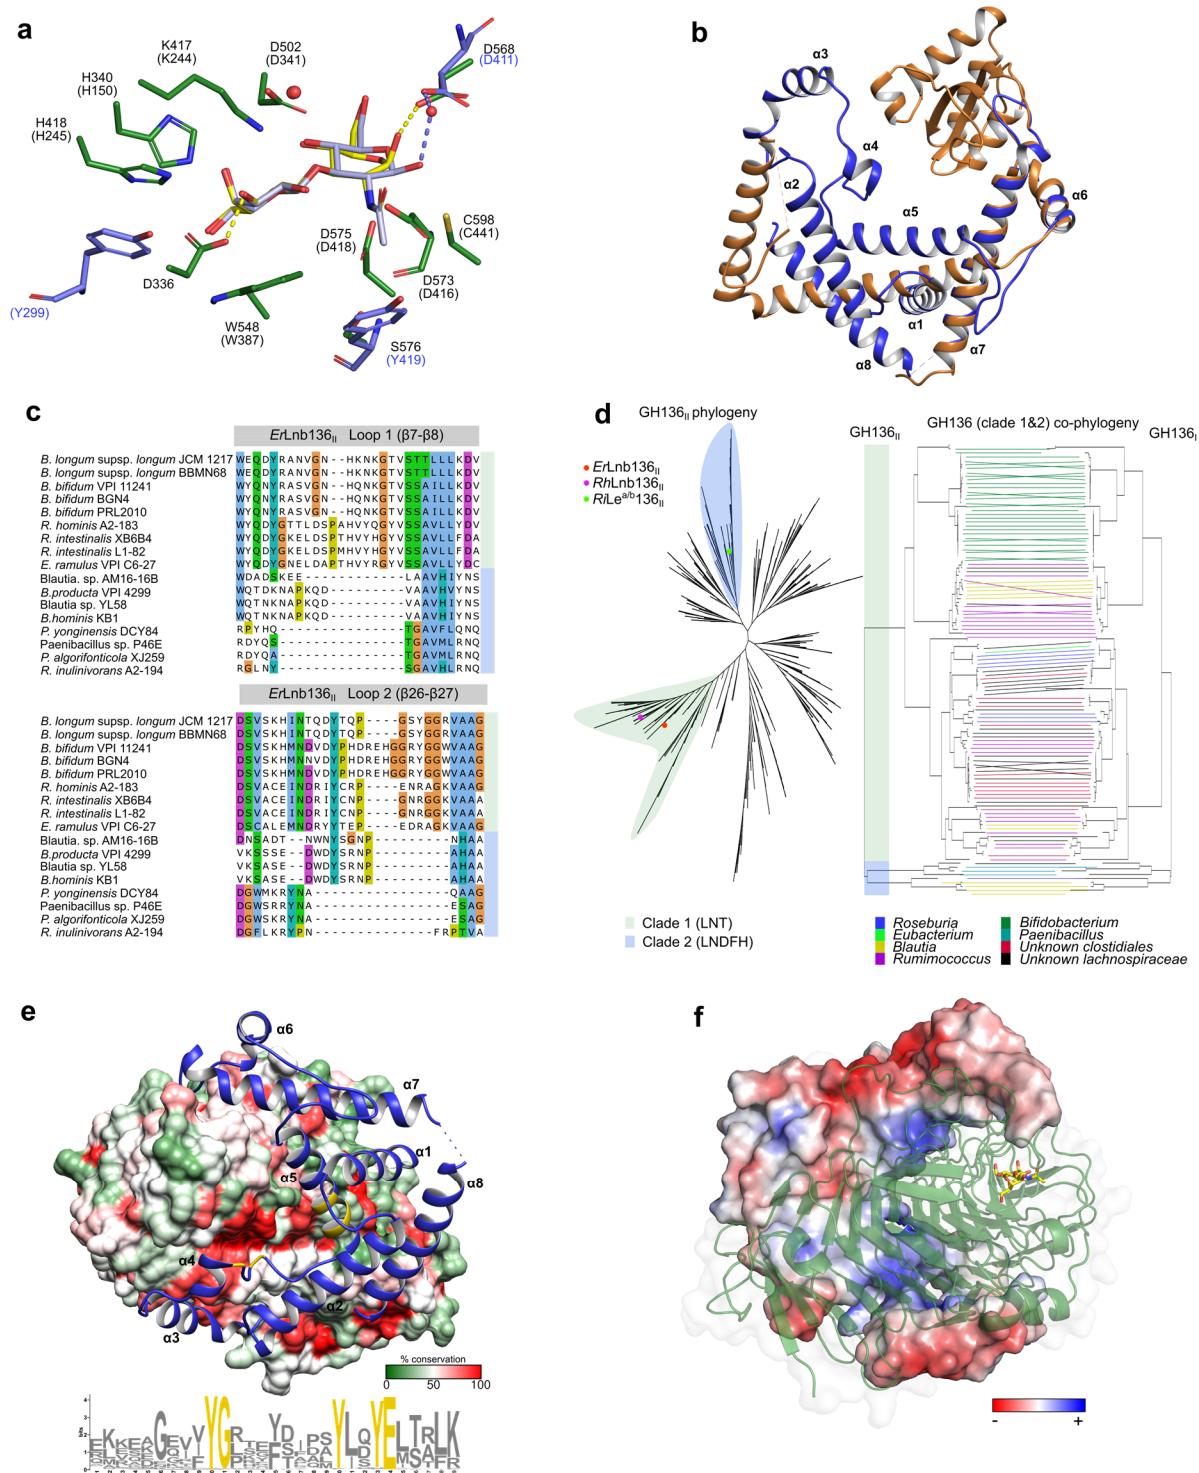

**Supplementary Fig. 9: Evolution of GH136 enzymes.** (a) Superimposition of LNB (yellow) bound in *ErLnb136* (green) and LNB (grey) in *BLnbX* from *B. longum* (light blue). Conserved residues are shown for *ErLnb136* and *BLnbX* (in parentheses). Residues Y299, Y419 and D411 of *BLnbX* that are variant compared to *ErLnb136* are shown in light blue to highlight differences in active site architecture and ligand binding. Water molecules are red spheres and hydrogen bonds are dashed lines in *ErLnb136* (yellow) and *BLnbX* (light blue). (b) Superimposition of *ErLnb136<sub>i</sub>* (blue) and most related structural homolog 5EZ1 (chain A) from *Heliobacter pylori* (orange), highlighting the large differences in protein fold. (c) Partial amino acid sequence alignment of GH136<sub>ii</sub> domains showing shortened loops around the active site in *R. inulinivorans* as compared to *ErLnb136* of *E. ramulus* (d) Phylogenetic tree of 985 GH136<sub>ii</sub> sequences identified by BLASTP search of *RhLnb136<sub>ii</sub>* or *RiLe<sup>a/b</sup>136<sub>ii</sub>* against non-redundant database (sequences with an e-values < 10<sup>-10</sup> are included). Tanglegram showing co-evolution of GH136<sub>i</sub> and GH136<sub>ii</sub> domains across 117 selected sequences of GH136<sub>ii</sub> phylogenetic tree clade 1 and clade 2. (e) Surface of *ErLnb136<sub>ii</sub>* colored by amino acid sequence conservation across 117 sequence as presented in (d) and cartoon presentation (blue) of *ErLnb136<sub>i</sub>* with conserved residues (yellow) as identified from a sequence motif generated via the MEME suite from 117 GH136<sub>i</sub> sequences as in (d). (f) Electrostatic surface of *ErLnb136<sub>i</sub>* and cartoon presentation of *ErLnb136<sub>ii</sub>* (green).
